# Supplementary material for: The Identification and Characterization of Endopolygalacturonases in a South African Isolate of Phytophthora cinnamomi
Source: MDPI journal article supplement (doi:10.3390/microorganisms10051061), 2022-05-20
Supplement: s1 [file s1]

# The identification and characterization of endopolygalacturonases in a South African isolate of *Phytophthora cinnamomi*

Journal: Microorganisms

Authors: Tsakani M. Miyambo, Robert Backer, Fourie Joubert, Juanita Engelbrecht, Nicolaas A. van der Merwe, Noëlani van den Berg

\*Address Correspondence to Tsakani M. Miyambo,  
tsakane.miyambo@fabi.up.ac.za

Affiliation: Department of Biochemistry, Genetics and Microbiology, University of Pretoria, Pretoria, Gauteng, South Africa.

Forestry and Agricultural Biotechnology Institute, University of Pretoria, Pretoria,

**Table S1. Polygalacturonase sequences from different *Phytophthora* spp. used for the multiple sequence alignment.**

| <b>Name</b> | <b>Species</b>                | <b>Protein ID</b> | <b>Database</b> | <b>Full-length/Partial</b> |
|-------------|-------------------------------|-------------------|-----------------|----------------------------|
| PCIPG2      | <i>Phytophthora capsici</i>   | ABD72596          | NCBI            | Full-length                |
| PCIPG5      | <i>P. capsici</i>             | ABU46393          | NCBI            | Full-length                |
| PCIPG8      | <i>P. capsici</i>             | ADN18844          | NCBI            | Full-length                |
| PCIPG9      | <i>P. capsici</i>             | ADN18850          | NCBI            | Full-length                |
| PCIPG10     | <i>P. capsici</i>             | ADN18854          | NCBI            | Full-length                |
| PCIPG11     | <i>P. capsici</i>             | ADN18855          | NCBI            | Full-length                |
| PCIPG12     | <i>P. capsici</i>             | ADN18856          | NCBI            | Full-length                |
| PCIPG13     | <i>P. capsici</i>             | ADN18842          | NCBI            | Full-length                |
| PCIPG14     | <i>P. capsici</i>             | ADN18847          | NCBI            | Full-length                |
| PCIPG15     | <i>P. capsici</i>             | ADN18851          | NCBI            | Full-length                |
| PCIPG16     | <i>P. capsici</i>             | ADN18852          | NCBI            | Full-length                |
| PCIPG17     | <i>P. capsici</i>             | ADN18853          | NCBI            | Full-length                |
| PCIPG18     | <i>P. capsici</i>             | ADN18846          | NCBI            | Full-length                |
| PCIPG19     | <i>P. capsici</i>             | ADN18849          | NCBI            | Partial                    |
| PCIPG20     | <i>P. capsici</i>             | ADN18845          | NCBI            | Full-length                |
| PCIPG21     | <i>P. capsici</i>             | ADN18843          | NCBI            | Full-length                |
| PCIPG22     | <i>P. capsici</i>             | ADN18848          | NCBI            | Full-length                |
| PCPG1       | <i>Phytophthora cinnamomi</i> | AAN34612          | NCBI            | Full-length                |
| PCPG2       | <i>P. cinnamomi</i>           | AAN34613          | NCBI            | Full-length                |
| PCPG3       | <i>P. cinnamomi</i>           | AAN34614          | NCBI            | Full-length                |
| PCPG4       | <i>P. cinnamomi</i>           | AAN34615          | NCBI            | Full-length                |
| PCPG6       | <i>P. cinnamomi</i>           | AAN34616          | NCBI            | Full-length                |
| PCPG7       | <i>P. cinnamomi</i>           | AAN05466          | NCBI            | Full-length                |
| PCPG8       | <i>P. cinnamomi</i>           | AAN05467          | NCBI            | Full-length                |
| PCPG9       | <i>P. cinnamomi</i>           | AAN05468          | NCBI            | Full-length                |
| PCPG10      | <i>P. cinnamomi</i>           | AAN05465          | NCBI            | Full-length                |
| PCPG12      | <i>P. cinnamomi</i>           | AAN05460          | NCBI            | Full-length                |
| PCPG14      | <i>P. cinnamomi</i>           | AAN05461          | NCBI            | Full-length                |
| PCPG15      | <i>P. cinnamomi</i>           | AAN05462          | NCBI            | Full-length                |
| PCPG16      | <i>P. cinnamomi</i>           | AAN05463          | NCBI            | Full-length                |

**Table S1. Polygalacturonase sequences from different *Phytophthora spp.* used for the multiple sequence alignment.**

| <b>Name</b> | <b>Species</b>                 | <b>Protein ID</b> | <b>Database</b> | <b>Full-length/Partial</b> |
|-------------|--------------------------------|-------------------|-----------------|----------------------------|
| PCPG19      | <i>P. cinnamomi</i>            | AAN05458          | NCBI            | Full-length                |
| PIPG1       | <i>P. infestans</i>            | AAK98644          | NCBI            | Full-length                |
| PIPG1-T40   | <i>Phytophthora infestans</i>  | XP_002996850      | NCBI            | Partial                    |
| PIPG2-T40   | <i>P. infestans</i>            | XP_002902085      | NCBI            | Full-length                |
| PIPG3-T40   | <i>P. infestans</i>            | XP_002897269      | NCBI            | Full-length                |
| PIPG4-T40   | <i>P. infestans</i>            | XP_002901692      | NCBI            | Full-length                |
| PIPG5-T40   | <i>P. infestans</i>            | XP_002897268      | NCBI            | Full-length                |
| PIPG6-T40   | <i>P. infestans</i>            | XP_002897267      | NCBI            | Full-length                |
| PIPG7-T40   | <i>P. infestans</i>            | XP_002996983      | NCBI            | Full-length                |
| PIPG8-T40   | <i>P. infestans</i>            | XP_002896211      | NCBI            | Partial                    |
| PIPG9-T40   | <i>P. infestans</i>            | XP_002896198      | NCBI            | Partial                    |
| PIPG10-T40  | <i>P. infestans</i>            | XP_002896197      | NCBI            | Partial                    |
| PIPG11-T40  | <i>P. infestans</i>            | XP_002896196      | NCBI            | Partial                    |
| PIPG12-T40  | <i>P. infestans</i>            | XP_002896192      | NCBI            | Partial                    |
| PIPG13-T40  | <i>P. infestans</i>            | XP_002896191      | NCBI            | Full-length                |
| PIPG14-T40  | <i>P. infestans</i>            | XP_002896190      | NCBI            | Full-length                |
| PIPG15-T40  | <i>P. infestans</i>            | XP_002896187      | NCBI            | Full-length                |
| PIPG16-T40  | <i>P. infestans</i>            | XP_002896186      | NCBI            | Partial                    |
| PIPG17-T40  | <i>P. infestans</i>            | XP_002895235      | NCBI            | Partial                    |
| PIPG18-T40  | <i>P. infestans</i>            | XP_002895234      | NCBI            | Full-length                |
| PIPG19-T40  | <i>P. infestans</i>            | XP_002895233      | NCBI            | Full-length                |
| PPPG1       | <i>Phytophthora parasitica</i> | AAW22993          | dbCAN           | Full-length                |
| PPPG2       | <i>P. parasitica</i>           | ABV82735          | dbCAN           | Full-length                |
| PPPG3       | <i>P. parasitica</i>           | ABV82736          | dbCAN           | Full-length                |
| PPPG4       | <i>P. parasitica</i>           | ABV82737          | dbCAN           | Full-length                |
| PPPG5       | <i>P. parasitica</i>           | ABV82738          | dbCAN           | Full-length                |
| PPPG6       | <i>P. parasitica</i>           | ABV82739          | dbCAN           | Full-length                |
| PPPG7       | <i>P. parasitica</i>           | ABV82740          | dbCAN           | Full-length                |
| PPPG8       | <i>P. parasitica</i>           | ABV82741          | dbCAN           | Full-length                |
| PPPG9       | <i>P. parasitica</i>           | ABV82742          | dbCAN           | Full-length                |
| PPPG10      | <i>P. parasitica</i>           | ABV82743          | dbCAN           | Full-length                |

**Table S1. Polygalacturonase sequences from different *Phytophthora spp.* used for the multiple sequence alignment.**

| <b>Name</b> | <b>Species</b>              | <b>Protein ID</b> | <b>Database</b> | <b>Full-length/Partial</b> |
|-------------|-----------------------------|-------------------|-----------------|----------------------------|
| PRPG1       | <i>Phytophthora ramorum</i> | 41820             | JGI             | Full-length                |
| PRPG2       | <i>P. ramorum</i>           | 72130             | JGI             | Partial                    |
| PRPG3       | <i>P. ramorum</i>           | 40980             | JGI             | Full-length                |
| PRPG4       | <i>P. ramorum</i>           | 48642             | JGI             | Partial                    |
| PRPG5       | <i>P. ramorum</i>           | 54493             | JGI             | Full-length                |
| PRPG6       | <i>P. ramorum</i>           | 54527             | JGI             | Full-length                |
| PRPG7       | <i>P. ramorum</i>           | 72133             | JGI             | Full-length                |
| PRPG9       | <i>P. ramorum</i>           | 72135             | JGI             | Full-length                |
| PRPG10      | <i>P. ramorum</i>           | 72134             | JGI             | Full-length                |
| PRPG11      | <i>P. ramorum</i>           | 83562             | JGI             | Full-length                |
| PRPG13      | <i>P. ramorum</i>           | 83564             | JGI             | Full-length                |
| PRPG14      | <i>P. ramorum</i>           | 83568             | JGI             | Full-length                |
| PRPG15      | <i>P. ramorum</i>           | 83573             | JGI             | Full-length                |
| PRPG16      | <i>P. ramorum</i>           | 83574             | JGI             | Full-length                |
| PSPG1       | <i>Phytophthora sojae</i>   | 247698            | JGI             | Full-length                |
| PSPG2       | <i>P. sojae</i>             | 250266            | JGI             | Full-length                |
| PSPG3       | <i>P. sojae</i>             | 259959            | JGI             | Full-length                |
| PSPG4       | <i>P. sojae</i>             | 260041            | JGI             | Full-length                |
| PSPG5       | <i>P. sojae</i>             | 260065            | JGI             | Full-length                |
| PSPG6       | <i>P. sojae</i>             | 322946            | JGI             | Full-length                |
| PSPG7       | <i>P. sojae</i>             | 487620            | JGI             | Partial                    |
| PSPG8       | <i>P. sojae</i>             | 505673            | JGI             | Partial                    |
| PSPG12      | <i>P. sojae</i>             | 522084            | JGI             | Full-length                |
| PSPG13      | <i>P. sojae</i>             | 259928            | JGI             | Full-length                |
| PSPG14      | <i>P. sojae</i>             | 259936            | JGI             | Full-length                |
| PSPG15      | <i>P. sojae</i>             | 259951            | JGI             | Full-length                |
| PSPG16      | <i>P. sojae</i>             | 333550            | JGI             | Full-length                |
| PSPG17      | <i>P. sojae</i>             | 333549            | JGI             | Full-length                |
| PSPG18      | <i>P. sojae</i>             | 430630            | JGI             | Full-length                |
| PSPG19      | <i>P. sojae</i>             | 505361            | JGI             | Full-length                |
| PSPG20      | <i>P. sojae</i>             | 506837            | JGI             | Full-length                |



**Table S1. Polygalacturonase sequences from different *Phytophthora spp.* used for the multiple sequence alignment.**

| <b>Name</b> | <b>Species</b>  | <b>Protein ID</b> | <b>Database</b> | <b>Full-length/Partial</b> |
|-------------|-----------------|-------------------|-----------------|----------------------------|
| PSPG21      | <i>P. sojae</i> | 507865            | JGI             | Full-length                |
| PSPG22      | <i>P. sojae</i> | 508703            | JGI             | Partial                    |
| PSPG23      | <i>P. sojae</i> | 509650            | JGI             | Partial                    |
| PSPG24      | <i>P. sojae</i> | 509900            | JGI             | Partial                    |
| PSPG25      | <i>P. sojae</i> | 330711            | JGI             | Partial                    |

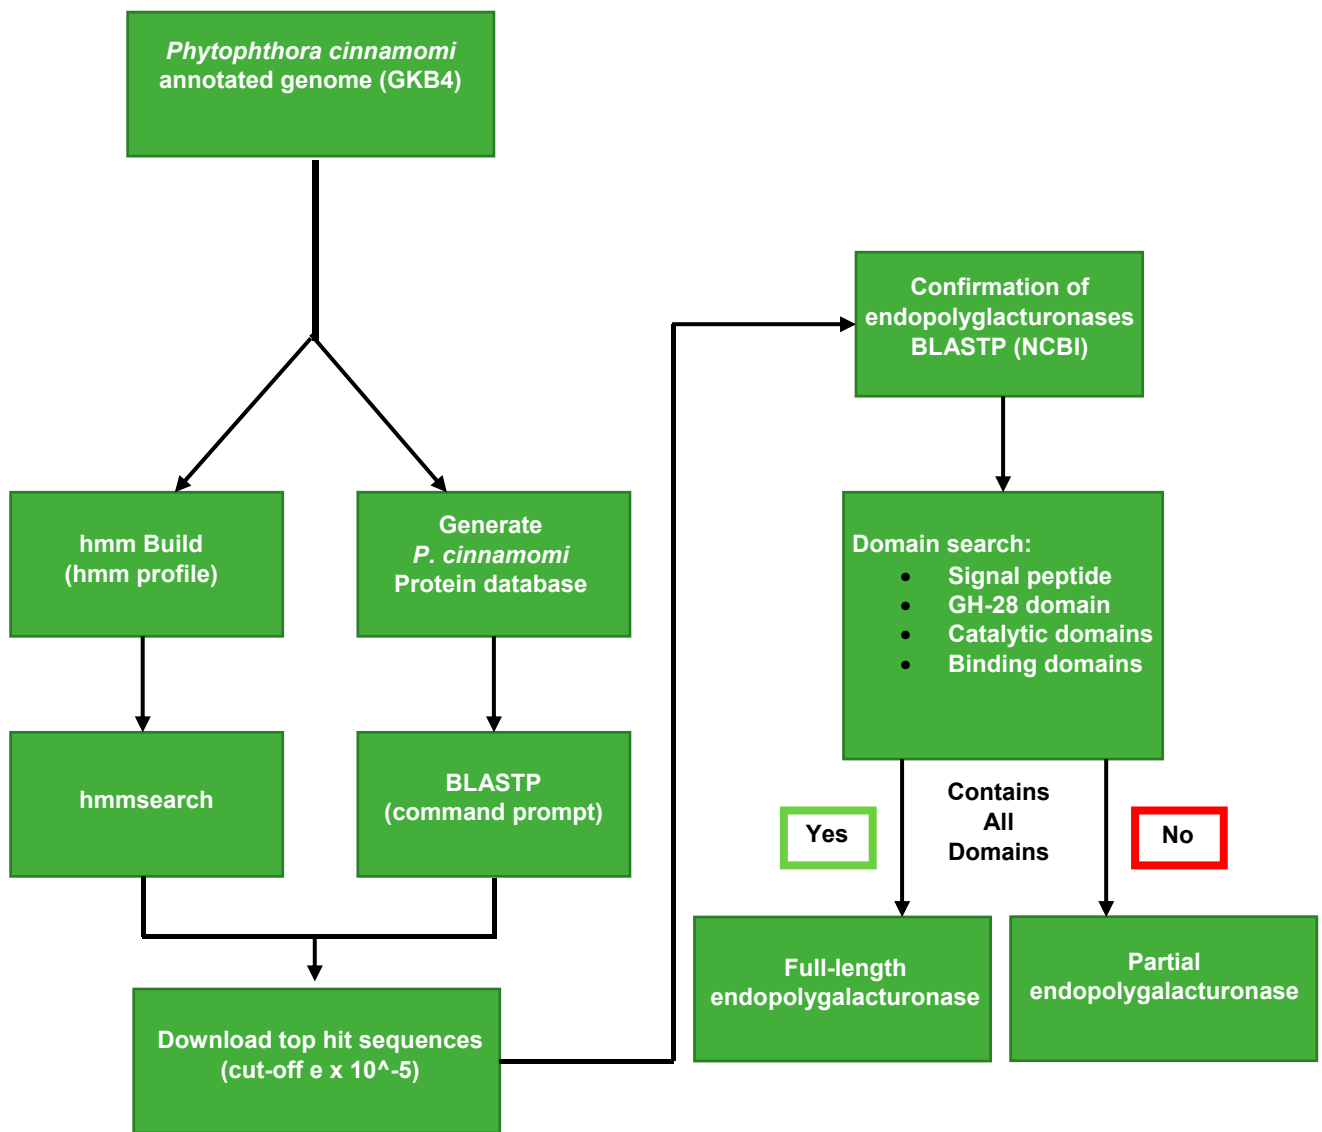

**Figure S1. Strategy flow diagram for the identification and characterization of polygalacturonases in *Phytophthora cinnamomi*.** A command line (hmm build) was used and run on a linux server to build an hmm profile from a multiple sequence alignment containing PG sequences from other *Phytophthora spp.* BLASTP analyses were also conducted using the server. The resultant sequences with a cut-off value  $\leq$  E-value  $\times 10^{-5}$  were selected and BLASTP analyses were performed against the (NCBI-nr) to confirm that they were PG sequences. The sequences were subjected to signature domain search and classified as either full-length or partial sequences. The sequences that lacked either one or more domains were considered as partial sequence.

**Table S2. Polygalacturonase sequences from outgroup species and their ID as depicted on the phylogenetic trees.**

| <b>Outgroup Species</b>                                     | <b>Tree ID</b>      | <b>Accession number/<br/>Protein ID</b> | <b>Trophic lifestyle</b> | <b>Signal peptide</b> | <b>Domain</b>      | <b>Source</b>       |
|-------------------------------------------------------------|---------------------|-----------------------------------------|--------------------------|-----------------------|--------------------|---------------------|
| <b><i>Phytophthora cinnamomi</i> GKB4 Phylogenetic Tree</b> |                     |                                         |                          |                       |                    |                     |
| <i>Pythium vexans</i>                                       | Py_vex_PG1_H        | EPrPVT00000022936                       | Hemibiotrophic           | 1-18                  | I, II, III, IV & V | ENSEMBL<br>PROTISTS |
| <i>Pythium arrhenomanes</i>                                 | Py_arr_PG1_N        | EPrPRT00000024470                       | Necrotrophic             | 1-22                  | I, II, III, IV & V | ENSEMBL<br>PROTISTS |
| <i>Pythium aphanidermatum</i>                               | Py_apl_PG1_N        | EPrPA00000023057                        | Necrotrophic             | 1-20                  | I, II, III, IV & V | ENSEMBL<br>PROTISTS |
| <i>Plasmopara halstedii</i>                                 | Pl_hal_PG1_B        | CEG40133                                | Biotrophic               | 1-25                  | I, II, III, IV & V | NCBI                |
| <i>P. halstedii</i>                                         | Pl_hal_PG2_B        | CEG49916                                | Biotrophic               | 1-20                  | I, II, III, IV & V | NCBI                |
| <i>Saprolegnia diclina</i>                                  | Sa_dic_PG1_N        | XM_008613903                            | Necrotrophic             | 1-20                  | I, II, III, IV & V | NCBI                |
| <i>S. diclina</i>                                           | Sa_dic_PG2_N        | XM_008605568                            | Necrotrophic             | 1-20                  | I, II, III, IV & V | NCBI                |
| <i>S. diclina</i>                                           | Sa_dic_PG3_N        | XP_008612126                            | Necrotrophic             | 1-20                  | I, II, III, IV & V | NCBI                |
| <b>Oomycetes Phylogenetic Tree</b>                          |                     |                                         |                          |                       |                    |                     |
| <i>Fragilariopsis cylindrus</i>                             | Fl_cyl_PG1_Outgroup | KV784353                                | ---                      | 1-28                  | I & II             | NCBI                |

**Table S3. Polygalacturonase sequences from oomycete species and their ID as depicted on the phylogenetic tree.**

| <b>Species</b>                | <b>Tree ID</b> | <b>Accession number/<br/>Protein ID</b> | <b>Trophic<br/>lifestyle</b> | <b>Signal<br/>peptide</b> | <b>Domain</b>      | <b>Source</b> |
|-------------------------------|----------------|-----------------------------------------|------------------------------|---------------------------|--------------------|---------------|
| <i>Phytophthora cinnamomi</i> | Ph_cin_PG1_H   | AAN34612/ 243190                        | Hemibiotrophic               | 1-20                      | I, II, III, IV & V | NCBI/ JGI     |
| <i>P. cinnamomi</i>           | Ph_cin_PG2_H   | AAN34613                                | Hemibiotrophic               | 1-20                      | I, II, III, IV & V | NCBI          |
| <i>P. cinnamomi</i>           | Ph_cin_PG3_H   | AAN34614                                | Hemibiotrophic               | 1-20                      | I, II, III, IV & V | NCBI          |
| <i>P. cinnamomi</i>           | Ph_cin_PG4_H   | AAN34615                                | Hemibiotrophic               | 1-20                      | I, II, III, IV & V | NCBI          |
| <i>P. cinnamomi</i>           | Ph_cin_PG5_H   | 94850                                   | Hemibiotrophic               | 1-19                      | I, II, III, IV & V | JGI           |
| <i>P. cinnamomi</i>           | Ph_cin_PG6_H   | AAN34616                                | Hemibiotrophic               | 1-20                      | I, II, III, IV & V | NCBI          |
| <i>P. cinnamomi</i>           | Ph_cin_PG7_H   | AF398946                                | Hemibiotrophic               | 1-20                      | I, II, III, IV & V | NCBI          |
| <i>P. cinnamomi</i>           | Ph_cin_PG8_H   | AF398947                                | Hemibiotrophic               | 1-20                      | I, II, III, IV & V | NCBI          |
| <i>P. cinnamomi</i>           | Ph_cin_PG9_H   | AF398948                                | Hemibiotrophic               | 1-20                      | I, II, III, IV & V | NCBI          |
| <i>P. cinnamomi</i>           | Ph_cin_PG10_H  | AF398945                                | Hemibiotrophic               | 1-20                      | I, II, III, IV & V | NCBI          |
| <i>P. cinnamomi</i>           | Ph_cin_PG11_H  | 243146                                  | Hemibiotrophic               | 1-20                      | I, II, III, IV & V | JGI           |
| <i>P. cinnamomi</i>           | Ph_cin_PG12_H  | AF398938                                | Hemibiotrophic               | 1-22                      | I, II, III, IV & V | NCBI          |
| <i>P. cinnamomi</i>           | Ph_cin_PG13_H  | 243199                                  | Hemibiotrophic               | 1-20                      | I, II, III, IV & V | JGI           |
| <i>P. cinnamomi</i>           | Ph_cin_PG14_H  | AF398940                                | Hemibiotrophic               | 1-22                      | I, II, III, IV & V | NCBI          |
| <i>P. cinnamomi</i>           | Ph_cin_PG15_H  | AF398941                                | Hemibiotrophic               | 1-22                      | I, III, IV & V     | NCBI          |
| <i>P. cinnamomi</i>           | Ph_cin_PG16_H  | AF398942/ 243454                        | Hemibiotrophic               | 1-22                      | I, II, III, IV & V | NCBI/ JGI     |
| <i>P. cinnamomi</i>           | Ph_cin_PG17_H  | 243222                                  | Hemibiotrophic               | 1-20                      | I, II, III, IV & V | JGI           |

**Table S3. Polygalacturonase sequences from oomycete species and their ID as depicted on the phylogenetic tree.**

| <b>Species</b>      | <b>Tree ID</b> | <b>Accession number/<br/>Protein ID</b> | <b>Trophic<br/>lifestyle</b> | <b>Signal<br/>peptide</b> | <b>Domain</b>      | <b>Source</b>         |
|---------------------|----------------|-----------------------------------------|------------------------------|---------------------------|--------------------|-----------------------|
| <i>P. cinnamomi</i> | Ph_cin_PG18_H  | 321736                                  | Hemibiotrophic               | 1-20                      | I, II, III, IV & V | JGI                   |
| <i>P. cinnamomi</i> | Ph_cin_PG19_H  | AAN24612                                | Hemibiotrophic               | 1-20                      | I, II, III, IV & V | NCBI                  |
| <i>P. cinnamomi</i> | Ph_cin_PG20_H  | 557459                                  | Hemibiotrophic               | 1-20                      | I, II, III, IV & V | JGI                   |
| <i>P. cinnamomi</i> | Ph_cin_PG21_H  | 557452                                  | Hemibiotrophic               | 1-20                      | I, II, III, IV & V | JGI                   |
| <i>P. cinnamomi</i> | Ph_cin_PG22_H  | 557447                                  | Hemibiotrophic               | 1-20                      | I, II, III, IV & V | JGI                   |
| <i>P. cinnamomi</i> | Ph_cin_PG23_H  | 14823                                   | Hemibiotrophic               | 1-20                      | I, II, III, IV & V | JGI                   |
| <i>P. cinnamomi</i> | Ph_cin_PG24_H  | 258598                                  | Hemibiotrophic               | 1-22                      | I, II, III, IV & V | JGI                   |
| <i>P. cinnamomi</i> | Ph_cin_PG25_H  | 270732                                  | Hemibiotrophic               | 1-20                      | I, II, III, IV & V | JGI                   |
| <i>P. cinnamomi</i> | PcPG1          | OL334941                                | Hemibiotrophic               | 1-20                      | I, II, III, IV & V | ARP, Unpublished data |
| <i>P. cinnamomi</i> | PcPG2          | OL334942                                | Hemibiotrophic               | 1-20                      | I, II, III, IV & V | ARP, Unpublished data |
| <i>P. cinnamomi</i> | PcPG3          | OL334943                                | Hemibiotrophic               | 1-20                      | I, II, III, IV & V | ARP, Unpublished data |
| <i>P. cinnamomi</i> | PcPG4          | OL334944                                | Hemibiotrophic               | 1-20                      | I, II, III, IV & V | ARP, Unpublished data |
| <i>P. cinnamomi</i> | PcPG5          | OL334945                                | Hemibiotrophic               | 1-20                      | I, II, III, IV & V | ARP, Unpublished data |
| <i>P. cinnamomi</i> | PcPG6          | OL334946                                | Hemibiotrophic               | 1-20                      | I, II, III, IV & V | ARP, Unpublished data |
| <i>P. cinnamomi</i> | PcPG7          | OL334947                                | Hemibiotrophic               | 1-20                      | I, II, III, IV & V | ARP, Unpublished data |
| <i>P. cinnamomi</i> | PcPG8          | OL334948                                | Hemibiotrophic               | 1-20                      | I, II, III, IV & V | ARP, Unpublished data |
| <i>P. cinnamomi</i> | PcPG9          | OL334949                                | Hemibiotrophic               | 1-20                      | I, II, III, IV & V | ARP, Unpublished data |
| <i>P. cinnamomi</i> | PcPG10         | OL334950                                | Hemibiotrophic               | 1-20                      | I, II, III, IV & V | ARP, Unpublished data |

**Table S3. Polygalacturonase sequences from oomycete species and their ID as depicted on the phylogenetic tree.**

| <b>Species</b>                  | <b>Tree ID</b> | <b>Accession number/<br/>Protein ID</b> | <b>Trophic<br/>lifestyle</b> | <b>Signal<br/>peptide</b> | <b>Domain</b>      | <b>Source</b>         |
|---------------------------------|----------------|-----------------------------------------|------------------------------|---------------------------|--------------------|-----------------------|
| <i>P. cinnamomi</i>             | PcPG11         | OL334951                                | Hemibiotrophic               | 1-20                      | I, II, III, IV & V | ARP, Unpublished data |
| <i>P. cinnamomi</i>             | PcPG12         | OL334952                                | Hemibiotrophic               | 1-20                      | I, II, III, IV & V | ARP, Unpublished data |
| <i>P. cinnamomi</i>             | PcPG13         | OL334953                                | Hemibiotrophic               | 1-20                      | I, II, III, IV & V | ARP, Unpublished data |
| <i>P. cinnamomi</i>             | PcPG14         | OL334954                                | Hemibiotrophic               | 1-20                      | I, II, III, IV & V | ARP, Unpublished data |
| <i>P. cinnamomi</i>             | PcPG16         | OL334956                                | Hemibiotrophic               | 1-20                      | I, II, III, IV & V | ARP, Unpublished data |
| <i>P. cinnamomi</i>             | PcPG17         | OL334957                                | Hemibiotrophic               | 1-20                      | I, II, III, IV & V | ARP, Unpublished data |
| <i>P. cinnamomi</i>             | PcPG19         | OL334959                                | Hemibiotrophic               | 1-22                      | I, II, III, IV & V | ARP, Unpublished data |
| <i>P. cinnamomi</i>             | PcPG22         | OL334962                                | Hemibiotrophic               | 1-19                      | I, II, III, IV & V | ARP, Unpublished data |
| <i>P. cinnamomi</i>             | PcPG25         | OL334965                                | Hemibiotrophic               | 1-22                      | I, II, III, IV & V | ARP, Unpublished data |
| <i>Phytophthora<br/>capsici</i> | Ph_cap_PG1_H   | DQ415987                                | Hemibiotrophic               | 1-19                      | I, II, III, IV & V | NCBI                  |
| <i>P. capsici</i>               | Ph_cap_PG2_H   | EF558847                                | Hemibiotrophic               | 1-20                      | I, II, III, IV & V | NCBI                  |
| <i>P. capsici</i>               | Ph_cap_PG3_H   | GQ856521                                | Hemibiotrophic               | 1-20                      | I, II, III, IV & V | NCBI                  |
| <i>P. capsici</i>               | Ph_cap_PG4_H   | GQ856527                                | Hemibiotrophic               | 1-20                      | I, II, III, IV & V | NCBI                  |
| <i>P. capsici</i>               | Ph_cap_PG5_H   | GQ856531                                | Hemibiotrophic               | 1-20                      | I, II, III, IV & V | NCBI                  |
| <i>P. capsici</i>               | Ph_cap_PG6_H   | GQ856532                                | Hemibiotrophic               | 1-20                      | I, II, III, IV & V | NCBI                  |
| <i>P. capsici</i>               | Ph_cap_PG7_H   | GQ856533                                | Hemibiotrophic               | 1-19                      | I, II, III, IV & V | NCBI                  |
| <i>P. capsici</i>               | Ph_cap_PG8_H   | GQ856519                                | Hemibiotrophic               | 1-20                      | I, II, III, IV & V | NCBI                  |

**Table S3. Polygalacturonase sequences from oomycete species and their ID as depicted on the phylogenetic tree.**

| <b>Species</b>                    | <b>Tree ID</b> | <b>Accession number/<br/>Protein ID</b> | <b>Trophic<br/>lifestyle</b> | <b>Signal<br/>peptide</b> | <b>Domain</b>      | <b>Source</b> |
|-----------------------------------|----------------|-----------------------------------------|------------------------------|---------------------------|--------------------|---------------|
| <i>P. capsici</i>                 | Ph_cap_PG9_H   | GQ856524                                | Hemibiotrophic               | 1-20                      | I, II, III, IV & V | NCBI          |
| <i>P. capsici</i>                 | Ph_cap_PG10_H  | GQ856528                                | Hemibiotrophic               | 1-20                      | I, II, III, IV & V | NCBI          |
| <i>P. capsici</i>                 | Ph_cap_PG11_H  | GQ856529                                | Hemibiotrophic               | 1-20                      | I, II, III, IV & V | NCBI          |
| <i>P. capsici</i>                 | Ph_cap_PG12_H  | GQ856530                                | Hemibiotrophic               | 1-20                      | I, II, III, IV & V | NCBI          |
| <i>P. capsici</i>                 | Ph_cap_PG13_H  | GQ856523                                | Hemibiotrophic               | 1-20                      | I, II, III, IV & V | NCBI          |
| <i>P. capsici</i>                 | Ph_cap_PG14_H  | GQ856526                                | Hemibiotrophic               | 1-19                      | I, II, III, IV & V | NCBI          |
| <i>P. capsici</i>                 | Ph_cap_PG15_H  | GQ856522                                | Hemibiotrophic               | 1-19                      | I, II, III, IV & V | NCBI          |
| <i>P. capsici</i>                 | Ph_cap_PG16_H  | GQ856520                                | Hemibiotrophic               | 1-19                      | I, II, III, IV & V | NCBI          |
| <i>P. capsici</i>                 | Ph_cap_PG17_H  | GQ856525                                | Hemibiotrophic               | 1-22                      | I, II, III, IV & V | NCBI          |
| <i>Phytophthora<br/>infestans</i> | Ph_inf_PG1_H   | AAK98644                                | Hemibiotrophic               | 1-20                      | I, II, III & IV    | NCBI          |
| <i>P. infestans</i>               | Ph_inf_PG2_H   | XM_002902039                            | Hemibiotrophic               | 1-20                      | I, II, III, IV & V | NCBI          |
| <i>P. infestans</i>               | Ph_inf_PG3_H   | XM_002897222                            | Hemibiotrophic               | 1-20                      | I, II, III, IV & V | NCBI          |
| <i>P. infestans</i>               | Ph_inf_PG4_H   | XM_002896144                            | Hemibiotrophic               | 1-20                      | I, II, III, IV & V | NCBI          |
| <i>P. infestans</i>               | Ph_inf_PG5_H   | XM_002896141                            | Hemibiotrophic               | 1-20                      | I, II, III, IV & V | NCBI          |
| <i>P. infestans</i>               | Ph_inf_PG6_H   | XM_002895188                            | Hemibiotrophic               | 1-20                      | I, II, III, IV & V | NCBI          |
| <i>P. infestans</i>               | Ph_inf_PG7_H   | XM_002895187                            | Hemibiotrophic               | 1-20                      | I, II, III, IV & V | NCBI          |
| <i>P. infestans</i>               | Ph_inf_PG8_H   | XM_002896145                            | Hemibiotrophic               | 1-20                      | I, II, III, IV & V | NCBI          |

**Table S3. Polygalacturonase sequences from oomycete species and their ID as depicted on the phylogenetic tree.**

| <b>Species</b>                     | <b>Tree ID</b> | <b>Accession number/<br/>Protein ID</b> | <b>Trophic<br/>lifestyle</b> | <b>Signal<br/>peptide</b> | <b>Domain</b>      | <b>Source</b> |
|------------------------------------|----------------|-----------------------------------------|------------------------------|---------------------------|--------------------|---------------|
| <i>P. infestans</i>                | Ph_inf_PG9_H   | XM_002901646                            | Hemibiotrophic               | 1-19                      | I, II, III, IV & V | NCBI          |
| <i>Phytophthora<br/>parasitica</i> | Ph_par_PG1_H   | AAW22993                                | Hemibiotrophic               | 1-20                      | I, II, IV & V      | NCBI          |
| <i>P. parasitica</i>               | Ph_par_PG2_H   | ABV82735                                | Hemibiotrophic               | 1-20                      | I, II, III, IV & V | NCBI          |
| <i>P. parasitica</i>               | Ph_par_PG3_H   | ABV82736                                | Hemibiotrophic               | 1-20                      | I, II, III, IV & V | NCBI          |
| <i>P. parasitica</i>               | Ph_par_PG4_H   | ABV82737                                | Hemibiotrophic               | 1-20                      | I, II, III, IV & V | NCBI          |
| <i>P. parasitica</i>               | Ph_par_PG5_H   | ABV82738                                | Hemibiotrophic               | 1-19                      | I, II, III, IV & V | NCBI          |
| <i>P. parasitica</i>               | Ph_par_PG6_H   | ABV82739                                | Hemibiotrophic               | 1-20                      | I, II, III, IV & V | NCBI          |
| <i>P. parasitica</i>               | Ph_par_PG7_H   | ABV82740                                | Hemibiotrophic               | 1-17                      | I, II, III, IV & V | NCBI          |
| <i>P. parasitica</i>               | Ph_par_PG8_H   | ABV82741                                | Hemibiotrophic               | 1-20                      | I, II, III, IV & V | NCBI          |
| <i>P. parasitica</i>               | Ph_par_PG9_H   | ABV82742                                | Hemibiotrophic               | 1-19                      | I, II, III, IV & V | NCBI          |
| <i>P. parasitica</i>               | Ph_par_PG10_H  | ABV82743                                | Hemibiotrophic               | 1-20                      | I, II, III, IV & V | NCBI          |
| <i>Phytophthora<br/>ramorum</i>    | Ph_ram_PG1_H   | 72135                                   | Hemibiotrophic               | 1-20                      | I, II, III, IV & V | JGI           |
| <i>P. ramorum</i>                  | Ph_ram_PG2_H   | 83562                                   | Hemibiotrophic               | 1-20                      | I, II, III, IV & V | JGI           |
| <i>P. ramorum</i>                  | Ph_ram_PG3_H   | 72134                                   | Hemibiotrophic               | 1-20                      | I, II, III, IV & V | JGI           |
| <i>P. ramorum</i>                  | Ph_ram_PG4_H   | 83565                                   | Hemibiotrophic               | 1-20                      | I, II, III, IV & V | JGI           |
| <i>P. ramorum</i>                  | Ph_ram_PG5_H   | 83564                                   | Hemibiotrophic               | 1-20                      | I, II, III, IV & V | JGI           |
| <i>P. ramorum</i>                  | Ph_ram_PG6_H   | 83568                                   | Hemibiotrophic               | 1-20                      | I, II, III, IV & V | JGI           |



**Table S3. Polygalacturonase sequences from oomycete species and their ID as depicted on the phylogenetic tree.**

| <b>Species</b>            | <b>Tree ID</b> | <b>Accession number/<br/>Protein ID</b> | <b>Trophic<br/>lifestyle</b> | <b>Signal<br/>peptide</b> | <b>Domain</b>      | <b>Source</b> |
|---------------------------|----------------|-----------------------------------------|------------------------------|---------------------------|--------------------|---------------|
| <i>P. ramorum</i>         | Ph_ram_PG9_H   | 83574                                   | Hemibiotrophic               | 1-20                      | I, II, III, IV & V | JGI           |
| <i>Phytophthora sojae</i> | Ph_soj_PG1_H   | 260065                                  | Hemibiotrophic               | 1-20                      | I, II, III & V     | JGI           |
| <i>P. sojae</i>           | Ph_soj_PG2_H   | 260041                                  | Hemibiotrophic               | 1-20                      | I, II, III, IV & V | JGI           |
| <i>P. sojae</i>           | Ph_soj_PG3_H   | 259936                                  | Hemibiotrophic               | 1-20                      | I, II, III, IV & V | JGI           |
| <i>P. sojae</i>           | Ph_soj_PG4_H   | 259959                                  | Hemibiotrophic               | 1-19                      | I, II, III, IV & V | JGI           |
| <i>P. sojae</i>           | Ph_soj_PG5_H   | 250266                                  | Hemibiotrophic               | 1-19                      | I, II, III, IV & V | JGI           |
| <i>P. sojae</i>           | Ph_soj_PG6_H   | 322946                                  | Hemibiotrophic               | 1-22                      | I, II, III, IV & V | JGI           |
| <i>P. sojae</i>           | Ph_soj_PG7_H   | 507025                                  | Hemibiotrophic               | 1-20                      | I, II, III, IV & V | JGI           |
| <i>P. sojae</i>           | Ph_soj_PG8_H   | 506837                                  | Hemibiotrophic               | 1-20                      | I, II, III, IV & V | JGI           |
| <i>P. sojae</i>           | Ph_soj_PG9_H   | 507865                                  | Hemibiotrophic               | 1-20                      | I, II, III, IV & V | JGI           |
| <i>P. sojae</i>           | Ph_soj_PG10_H  | 508773                                  | Hemibiotrophic               | 1-20                      | I, II, III, IV & V | JGI           |
| <i>P. sojae</i>           | Ph_soj_PG11_H  | 508703                                  | Hemibiotrophic               | 1-19                      | I, II, III, IV & V | JGI           |
| <i>P. sojae</i>           | Ph_soj_PG12_H  | 509867                                  | Hemibiotrophic               | 1-20                      | I, II, III, IV & V | JGI           |
| <i>P. sojae</i>           | Ph_soj_PG13_H  | 509900                                  | Hemibiotrophic               | 1-20                      | I, II, III, IV & V | JGI           |
| <i>P. sojae</i>           | Ph_soj_PG14_H  | 509650                                  | Hemibiotrophic               | 1-20                      | I, II, III, IV & V | JGI           |
| <i>P. sojae</i>           | Ph_soj_PG15_H  | 505673                                  | Hemibiotrophic               | 1-20                      | I, II, III, IV & V | JGI           |
| <i>P. sojae</i>           | Ph_soj_PG16_H  | 259928                                  | Hemibiotrophic               | 1-20                      | I, II, III, IV & V | JGI           |

**Table S3. Polygalacturonase sequences from oomycete species and their ID as depicted on the phylogenetic tree.**

| <b>Species</b>                 | <b>Tree ID</b> | <b>Accession number/<br/>Protein ID</b> | <b>Trophic<br/>lifestyle</b> | <b>Signal<br/>peptide</b> | <b>Domain</b>      | <b>Source</b> |
|--------------------------------|----------------|-----------------------------------------|------------------------------|---------------------------|--------------------|---------------|
| <i>Phytophthora megakarya</i>  | Ph_meg_PG1_H   | OWY94663                                | Hemibiotrophic               | 1-20                      | I, II, III, IV & V | NCBI          |
| <i>P. megakarya</i>            | Ph_meg_PG2_H   | OWY98164                                | Hemibiotrophic               | 1-20                      | I, II, III, IV & V | NCBI          |
| <i>P. megakarya</i>            | Ph_meg_PG3_H   | OWZ12176                                | Hemibiotrophic               | 1-20                      | I, II, III, IV & V | NCBI          |
| <i>P. megakarya</i>            | Ph_meg_PG4_H   | OWY97638                                | Hemibiotrophic               | 1-20                      | I, II, III, IV & V | NCBI          |
| <i>P. megakarya</i>            | Ph_meg_PG5_H   | OWZ12175                                | Hemibiotrophic               | 1-20                      | I, II, III, IV & V | NCBI          |
| <i>P. megakarya</i>            | Ph_meg_PG6_H   | OWZ12177                                | Hemibiotrophic               | 1-20                      | I, II, III, IV & V | NCBI          |
| <i>P. megakarya</i>            | Ph_meg_PG7_H   | OWY98906                                | Hemibiotrophic               | 1-20                      | I, II, III, IV & V | NCBI          |
| <i>Phytophthora nicotianae</i> | Ph_nic_PG1_H   | KUF86279                                | Hemibiotrophic               | 1-20                      | I, II, III, IV & V | NCBI          |
| <i>P. nicotianae</i>           | Ph_nic_PG2_H   | KUF77588                                | Hemibiotrophic               | 1-20                      | I, II, III, IV & V | NCBI          |
| <i>P. nicotianae</i>           | Ph_nic_PG3_H   | KUF94022                                | Hemibiotrophic               | 1-20                      | I, II, III, IV & V | NCBI          |
| <i>P. nicotianae</i>           | Ph_nic_PG4_H   | KUF90172                                | Hemibiotrophic               | 1-19                      | I, II, IV & V      | NCBI          |
| <i>P. nicotianae</i>           | Ph_nic_PG5_H   | KUF84330                                | Hemibiotrophic               | 1-20                      | I, II, III, IV & V | NCBI          |
| <i>P. nicotianae</i>           | Ph_nic_PG6_H   | KUF94598                                | Hemibiotrophic               | 1-20                      | I, II, III, IV & V | NCBI          |
| <i>P. nicotianae</i>           | Ph_nic_PG7_H   | KUF94020                                | Hemibiotrophic               | 1-20                      | I, II, III, IV & V | NCBI          |
| <i>P. nicotianae</i>           | Ph_nic_PG8_H   | KUF94603                                | Hemibiotrophic               | 1-20                      | I, II, III, IV & V | NCBI          |
| <i>P. nicotianae</i>           | Ph_nic_PG9_H   | KUF91066                                | Hemibiotrophic               | 1-20                      | I, II, III, IV & V | NCBI          |
| <i>P. nicotianae</i>           | Ph_nic_PG10_H  | KUF91067                                | Hemibiotrophic               | 1-20                      | I, II, III, IV & V | NCBI          |

**Table S3. Polygalacturonase sequences from oomycete species and their ID as depicted on the phylogenetic tree.**

| <b>Species</b>                | <b>Tree ID</b> | <b>Accession number/<br/>Protein ID</b> | <b>Trophic<br/>lifestyle</b> | <b>Signal<br/>peptide</b> | <b>Domain</b>      | <b>Source</b>    |
|-------------------------------|----------------|-----------------------------------------|------------------------------|---------------------------|--------------------|------------------|
| <i>P. nicotianae</i>          | Ph_nic_PG11_H  | KUF94602                                | Hemibiotrophic               | 1-17                      | I, II, III, IV & V | NCBI             |
| <i>P. nicotianae</i>          | Ph_nic_PG12_H  | KUF78020                                | Hemibiotrophic               | 1-19                      | I, II, III, IV & V | NCBI             |
| <i>P. nicotianae</i>          | Ph_nic_PG13_H  | KUF84327                                | Hemibiotrophic               | 1-20                      | I, II, III, IV & V | NCBI             |
| <i>P. nicotianae</i>          | Ph_nic_PG14_H  | KUF94019                                | Hemibiotrophic               | 1-20                      | I, II, III, IV & V | NCBI             |
| <i>P. nicotianae</i>          | Ph_nic_PG15_H  | KUF86106                                | Hemibiotrophic               | 1-20                      | I, II, III, IV & V | NCBI             |
| <i>Pythium vexans</i>         | Py_vex_PG1_H   | EPrPVT00000022936                       | Hemibiotrophic               | 1-18                      | I, II, III, IV & V | ENSEMBL PROTISTS |
| <i>Pythium arrhenomanes</i>   | Py_arr_PG1_N   | EPrPRT00000024470                       | Necrotrophic                 | 1-22                      | I, II, III, IV & V | ENSEMBL PROTISTS |
| <i>Pythium aphanidermatum</i> | Py_aph_PG1_N   | EPrPA00000023057                        | Necrotrophic                 | 1-20                      | I, II, III, IV & V | ENSEMBL PROTISTS |
| <i>Plasmopara halstedii</i>   | PI_hal_PG1_B   | CEG40133                                | Biotrophic                   | 1-25                      | I, II, III, IV & V | NCBI             |
| <i>P. halstedii</i>           | PI_hal_PG2_B   | CEG49916                                | Biotrophic                   | 1-20                      | I, II, III, IV & V | NCBI             |

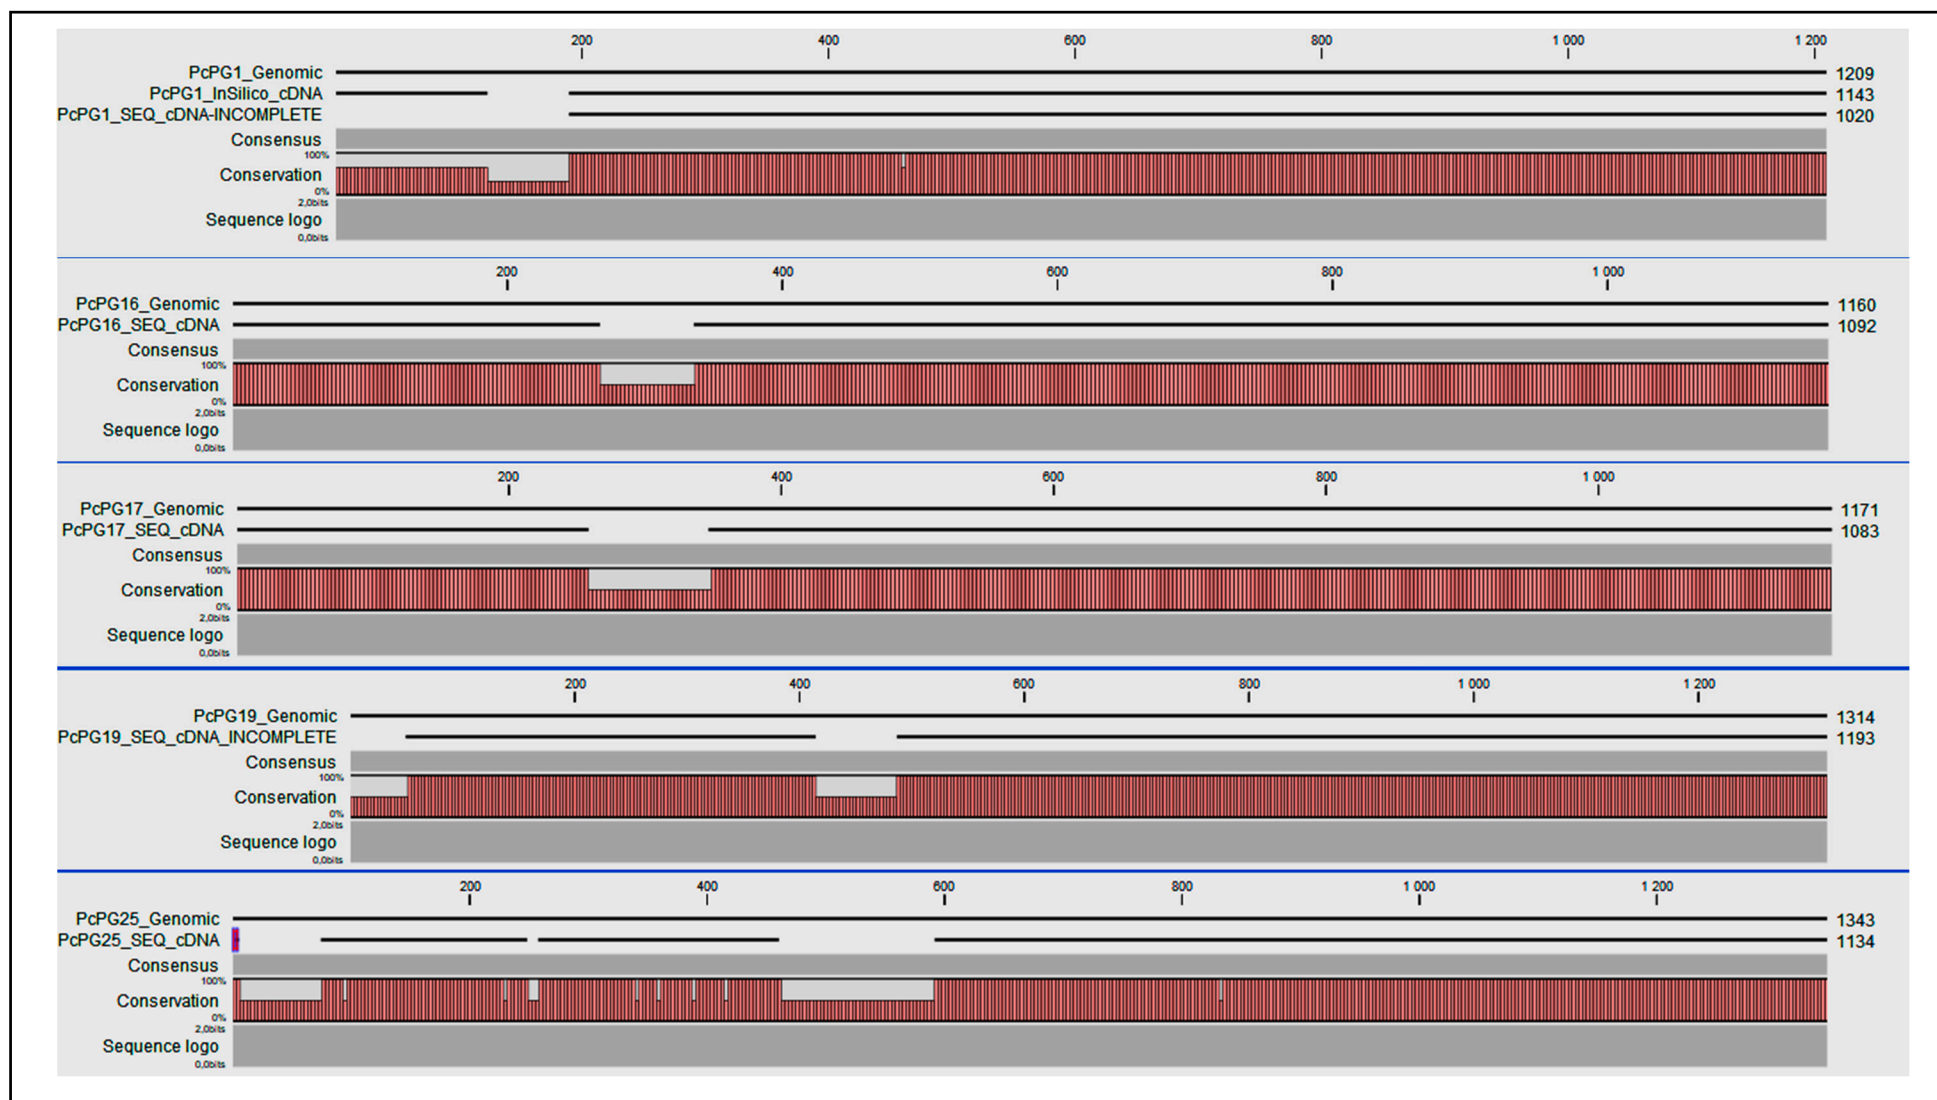

**Figure S2. Pairwise alignment (zoomed out) of intron-containing PG genomic sequences with their corresponding coding sequences.** The genomic sequences of the introns are shown with a solid grey line, below are the coding sequences of the respective PG genes. One intron is present in each PG gene as shown by the gap in the coding sequence marked as the cDNA sequence. The gap in the N-terminal region of *pcpg19* and *pcpg25* is not an indication of an intron region, the consensus sequence could not be attained in these regions due to many conflicts observed in these nucleotides using CLC Main Workbench. The *In silico* identified coding sequence of *pcpg1* was included to show the intron position as we were unable to get the consensus sequence of the beginning of the sequence. We do not expect to see an intron in the N-terminal region, therefore we suggest that this gene also has one intron as predicted *in silico*. The consensus sequence is shown below the alignment with a grey solid rectangular block and the sequence conservation is marked in light and dark maroon.





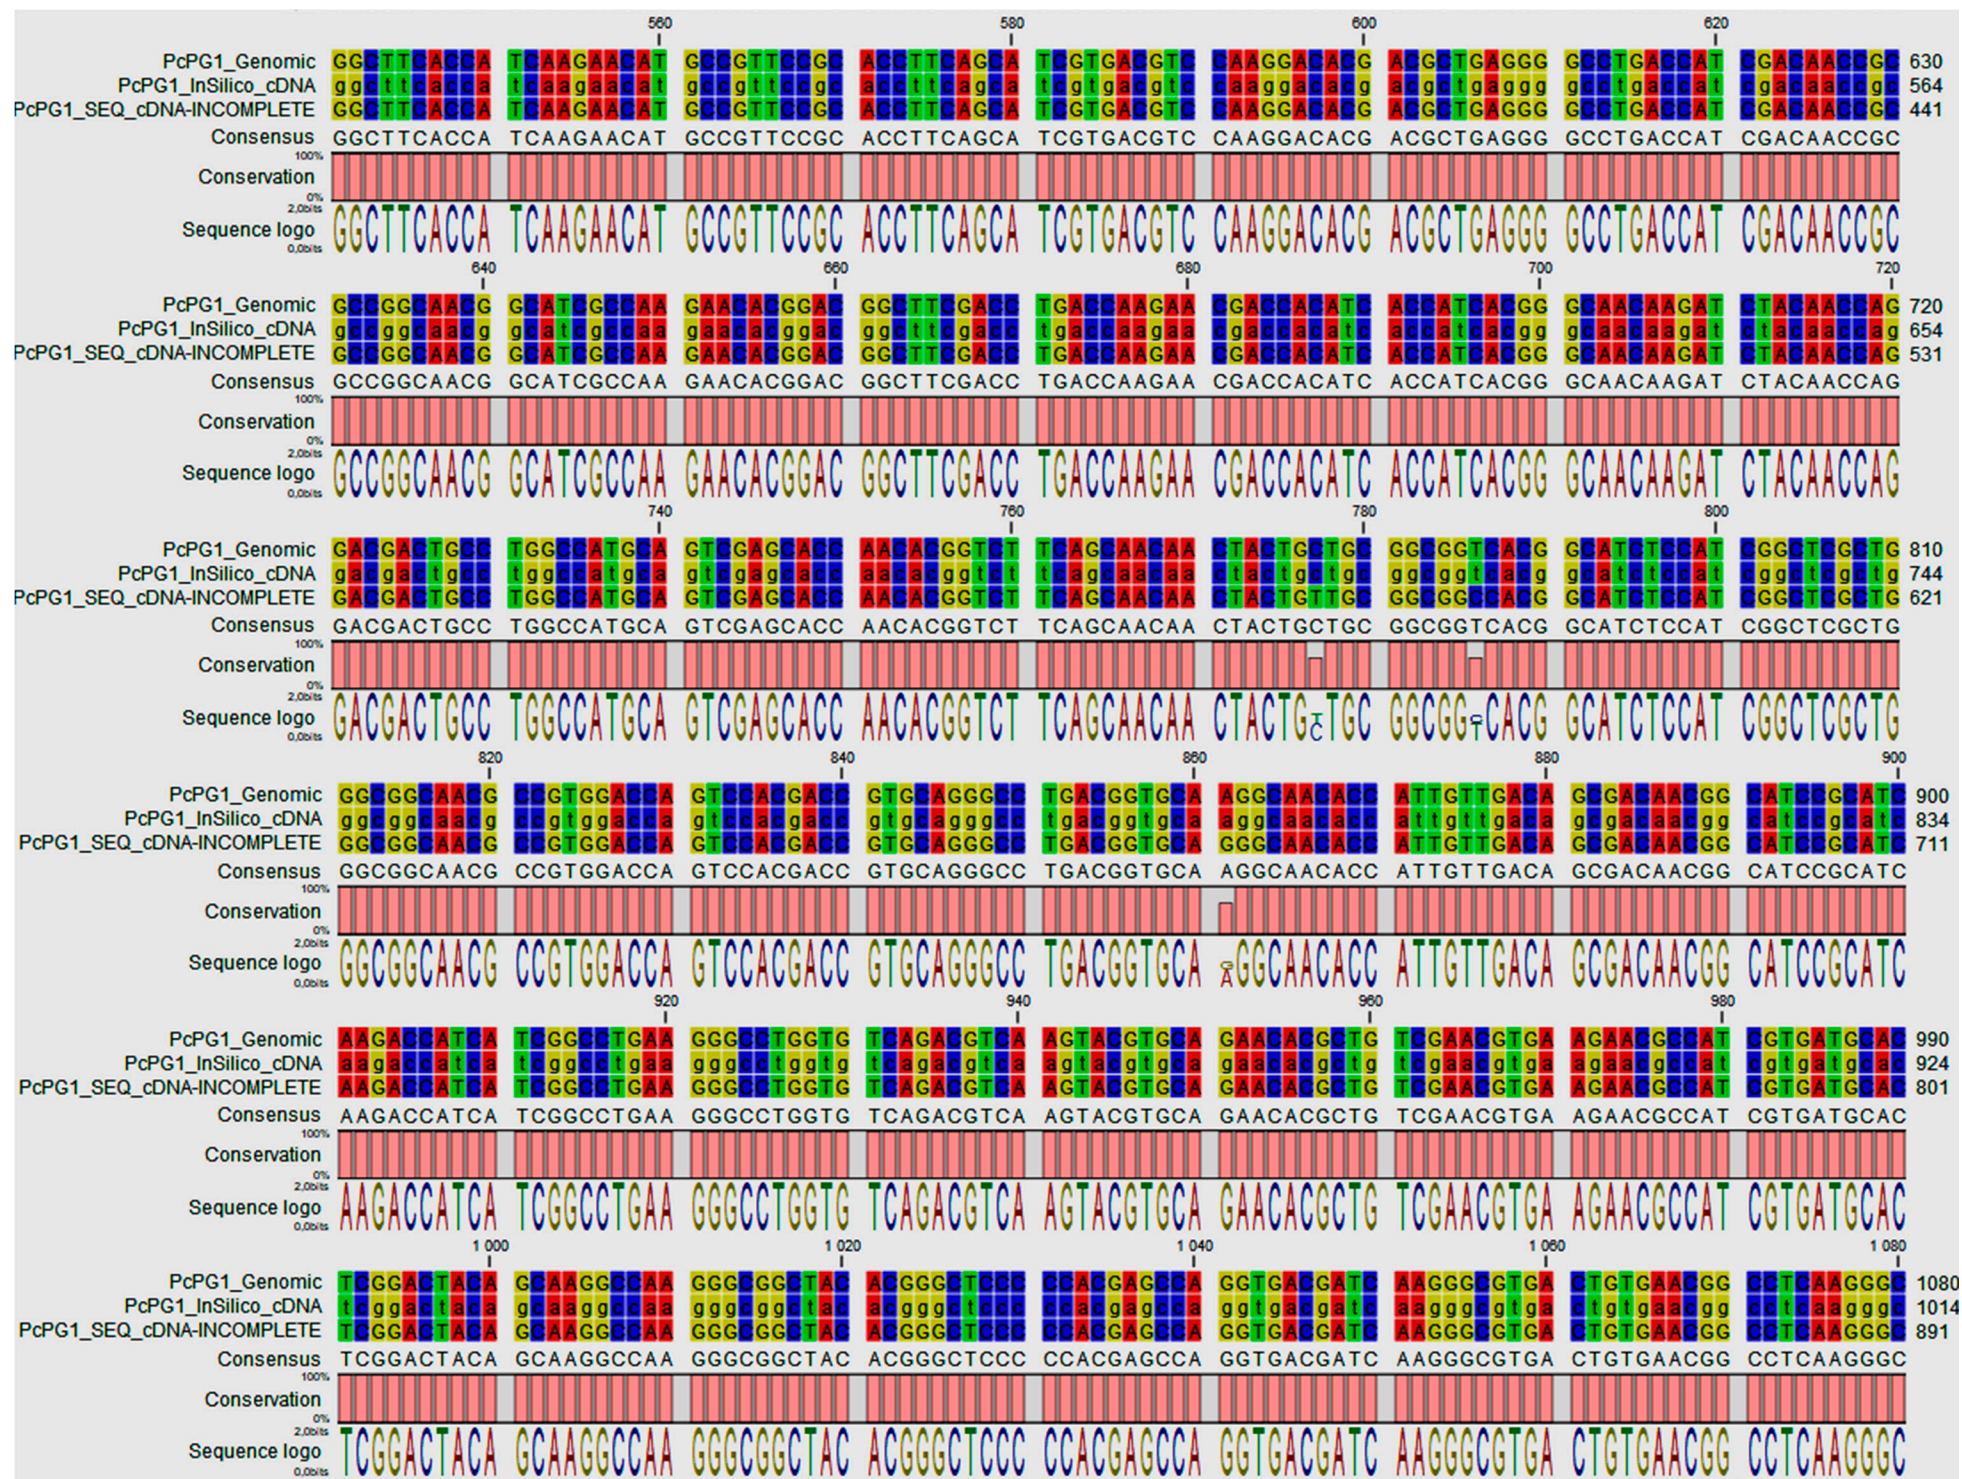

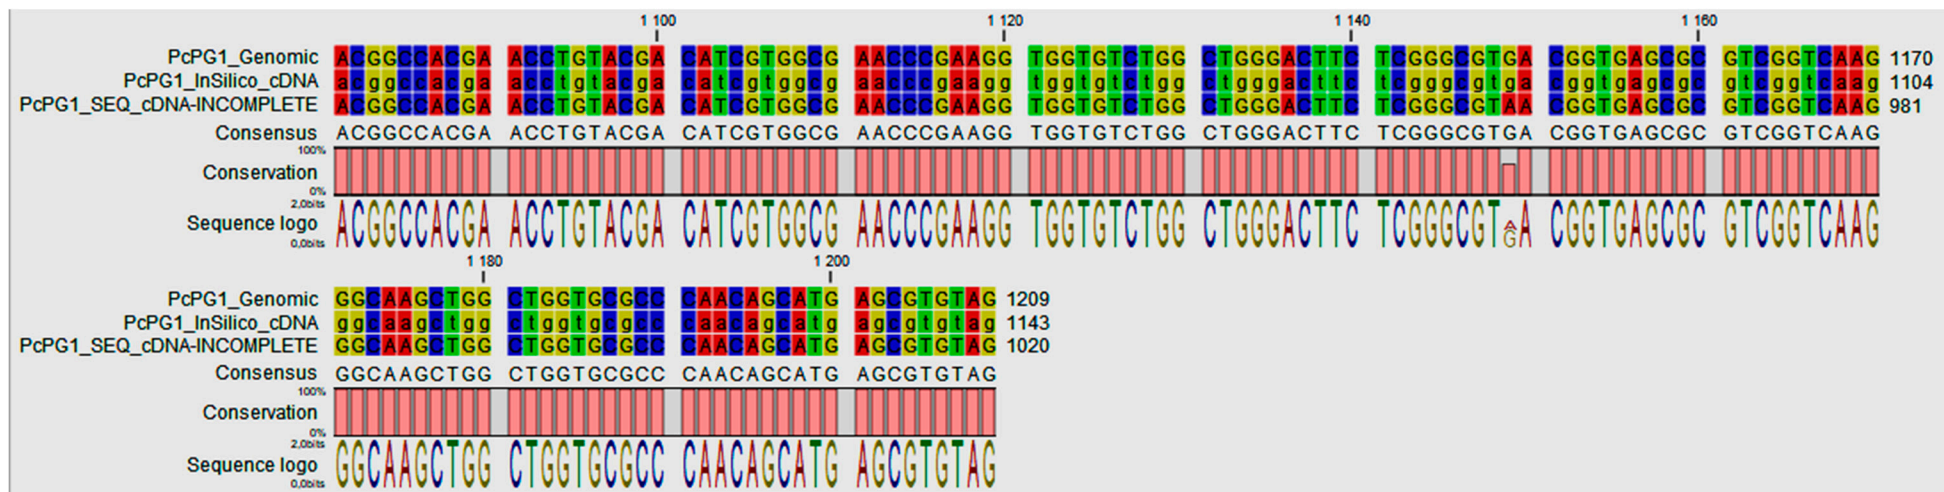



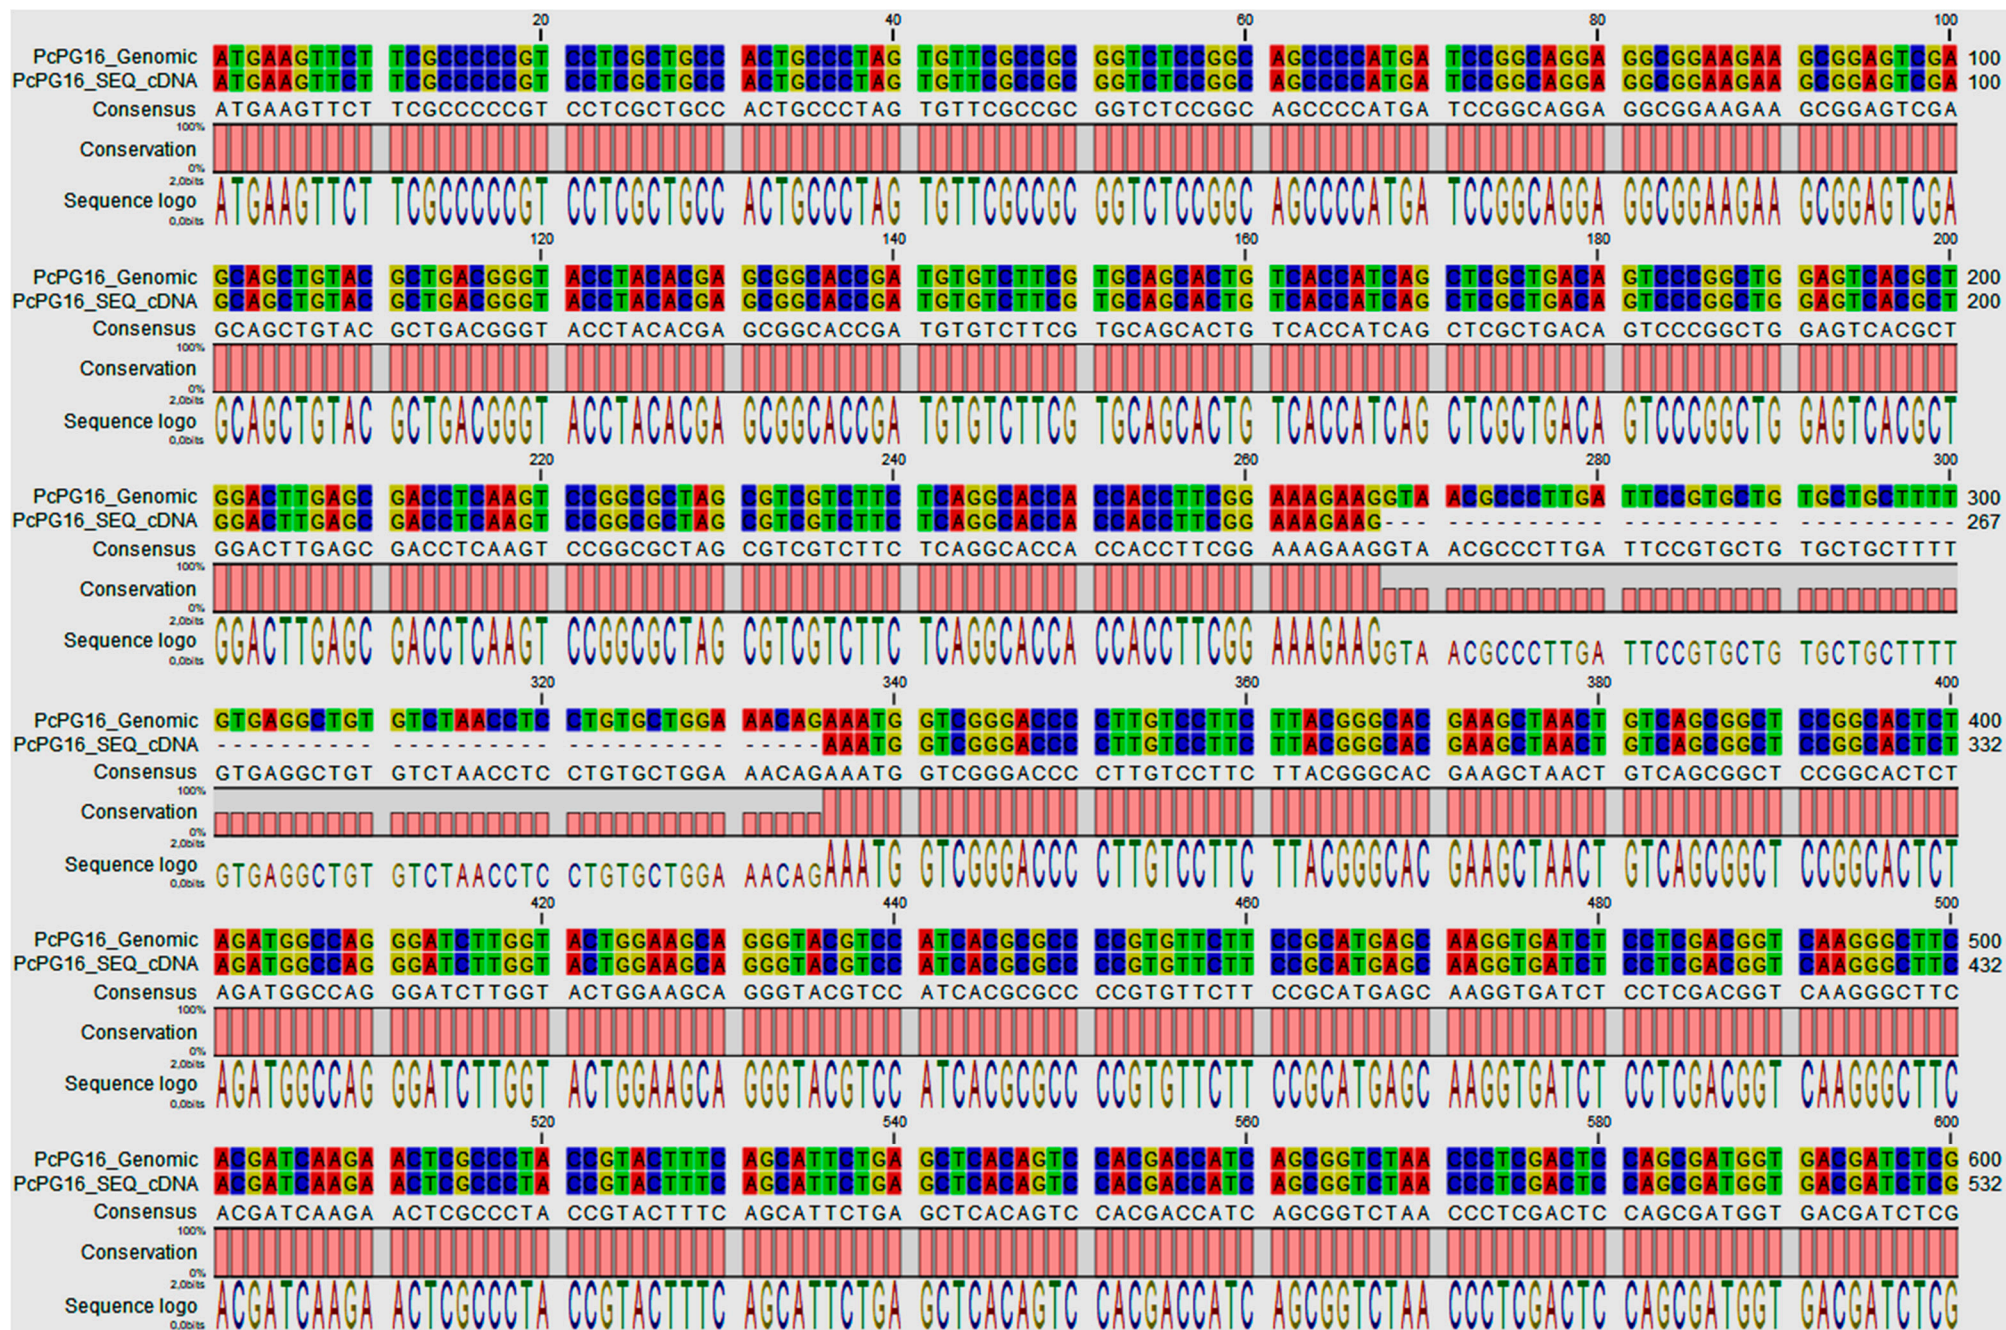



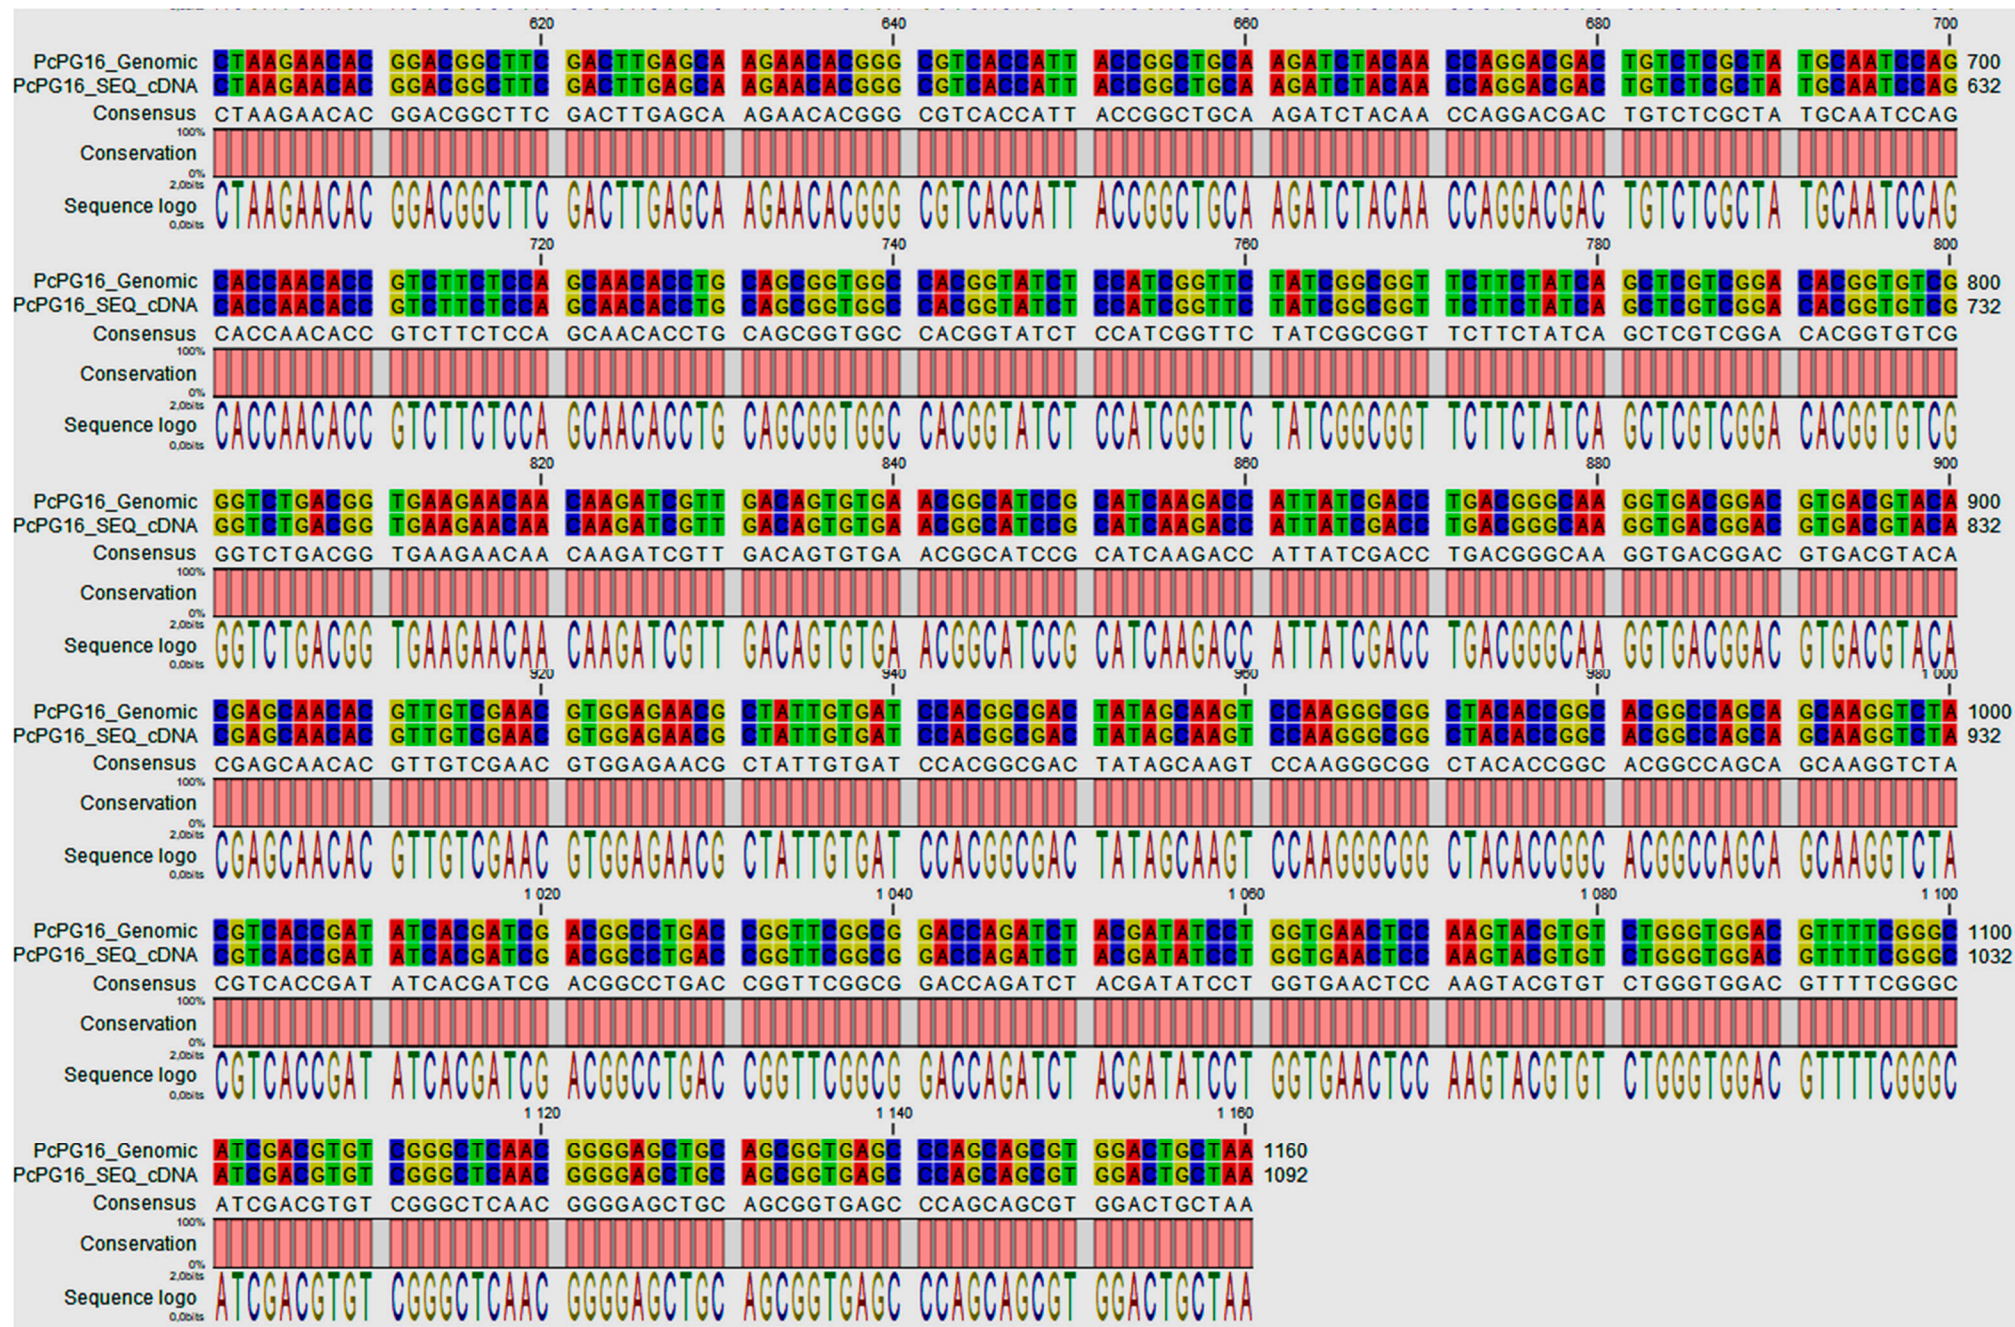



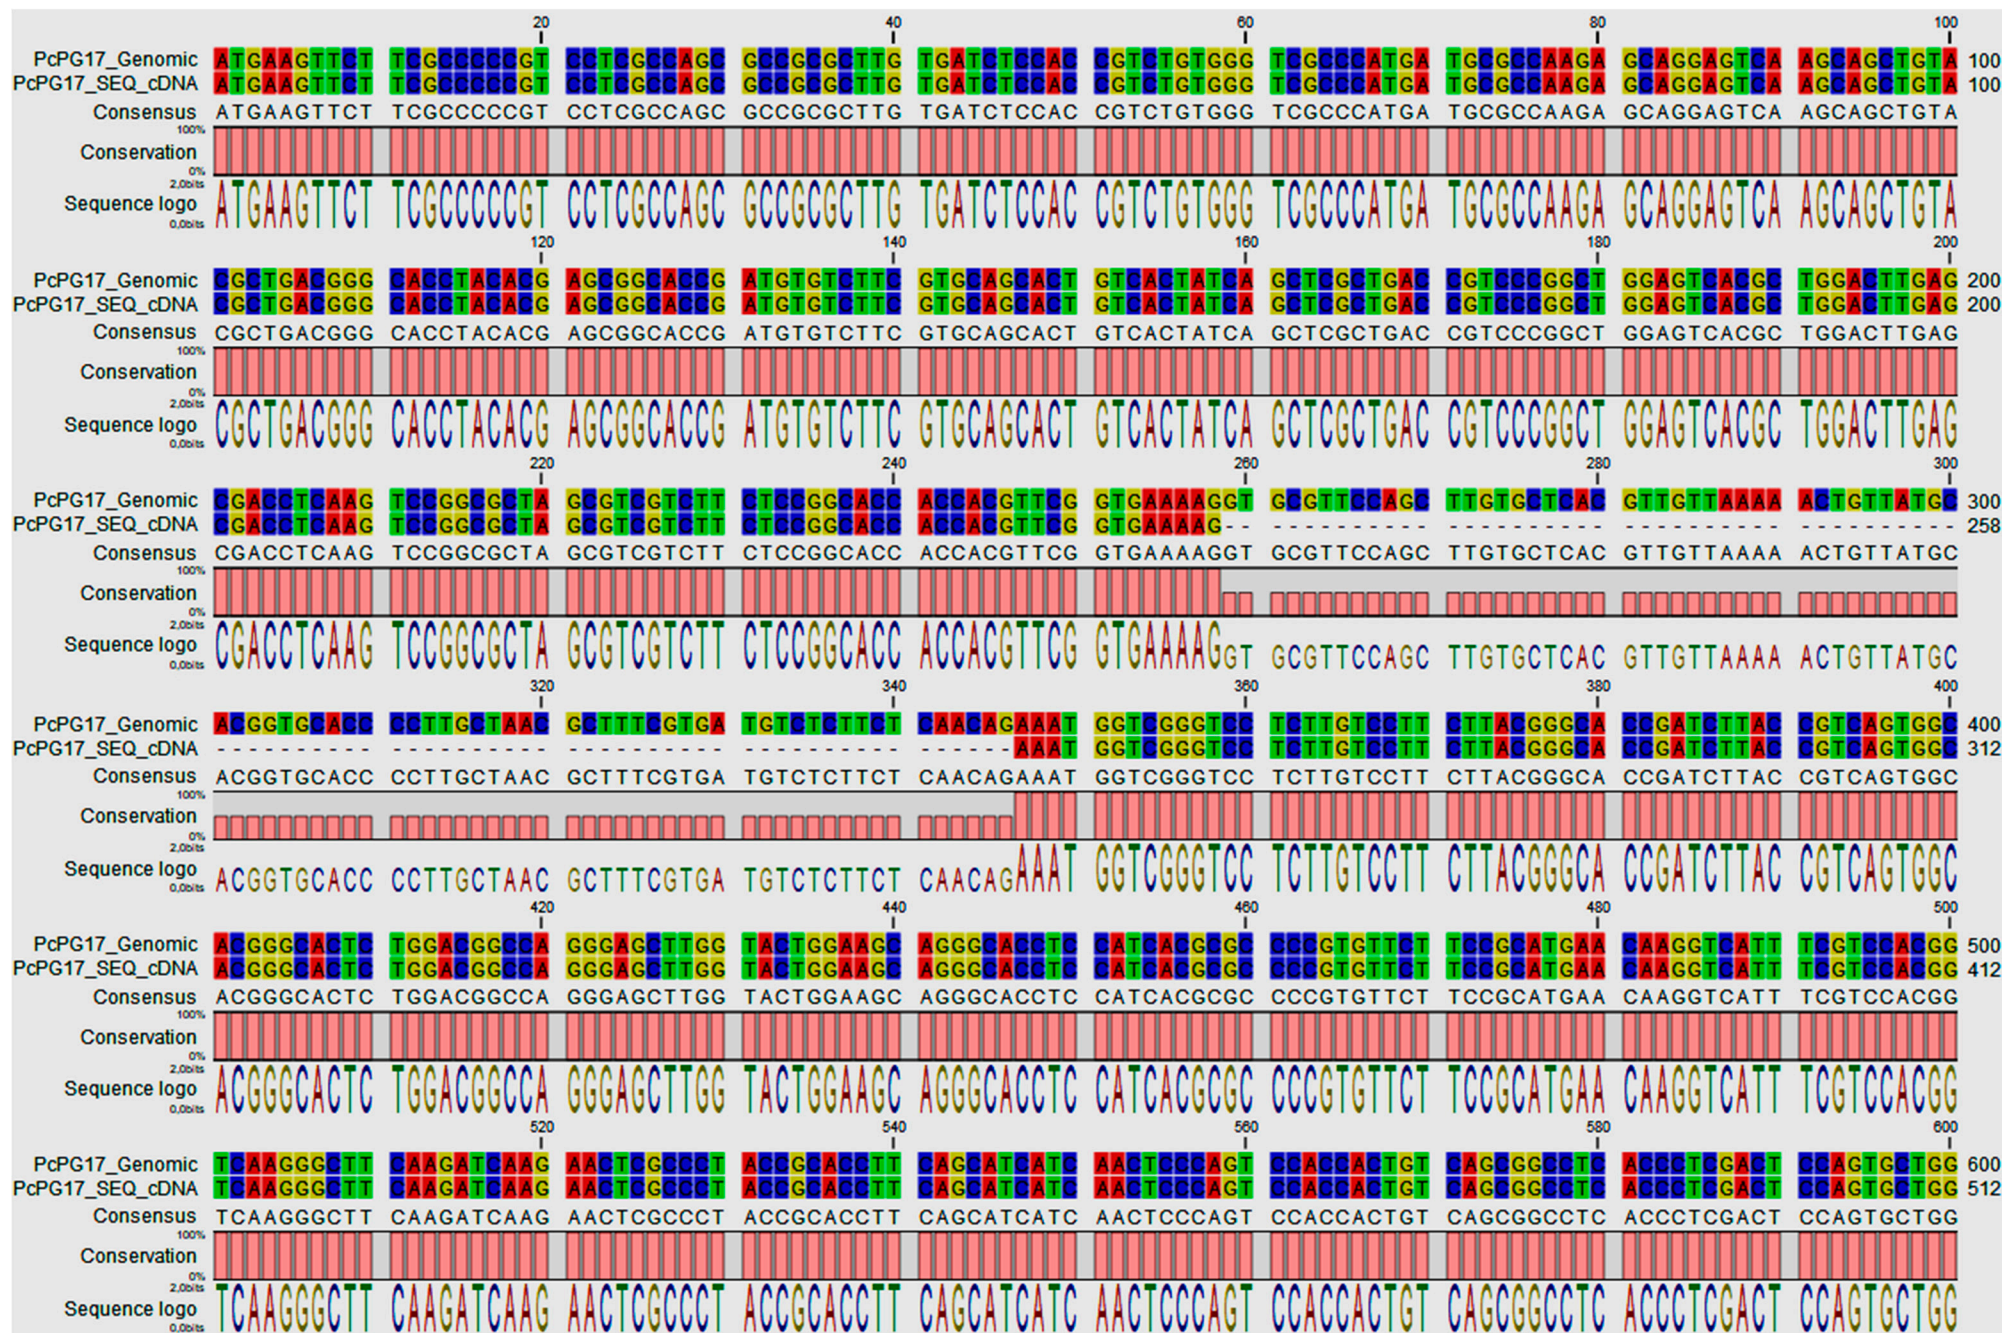



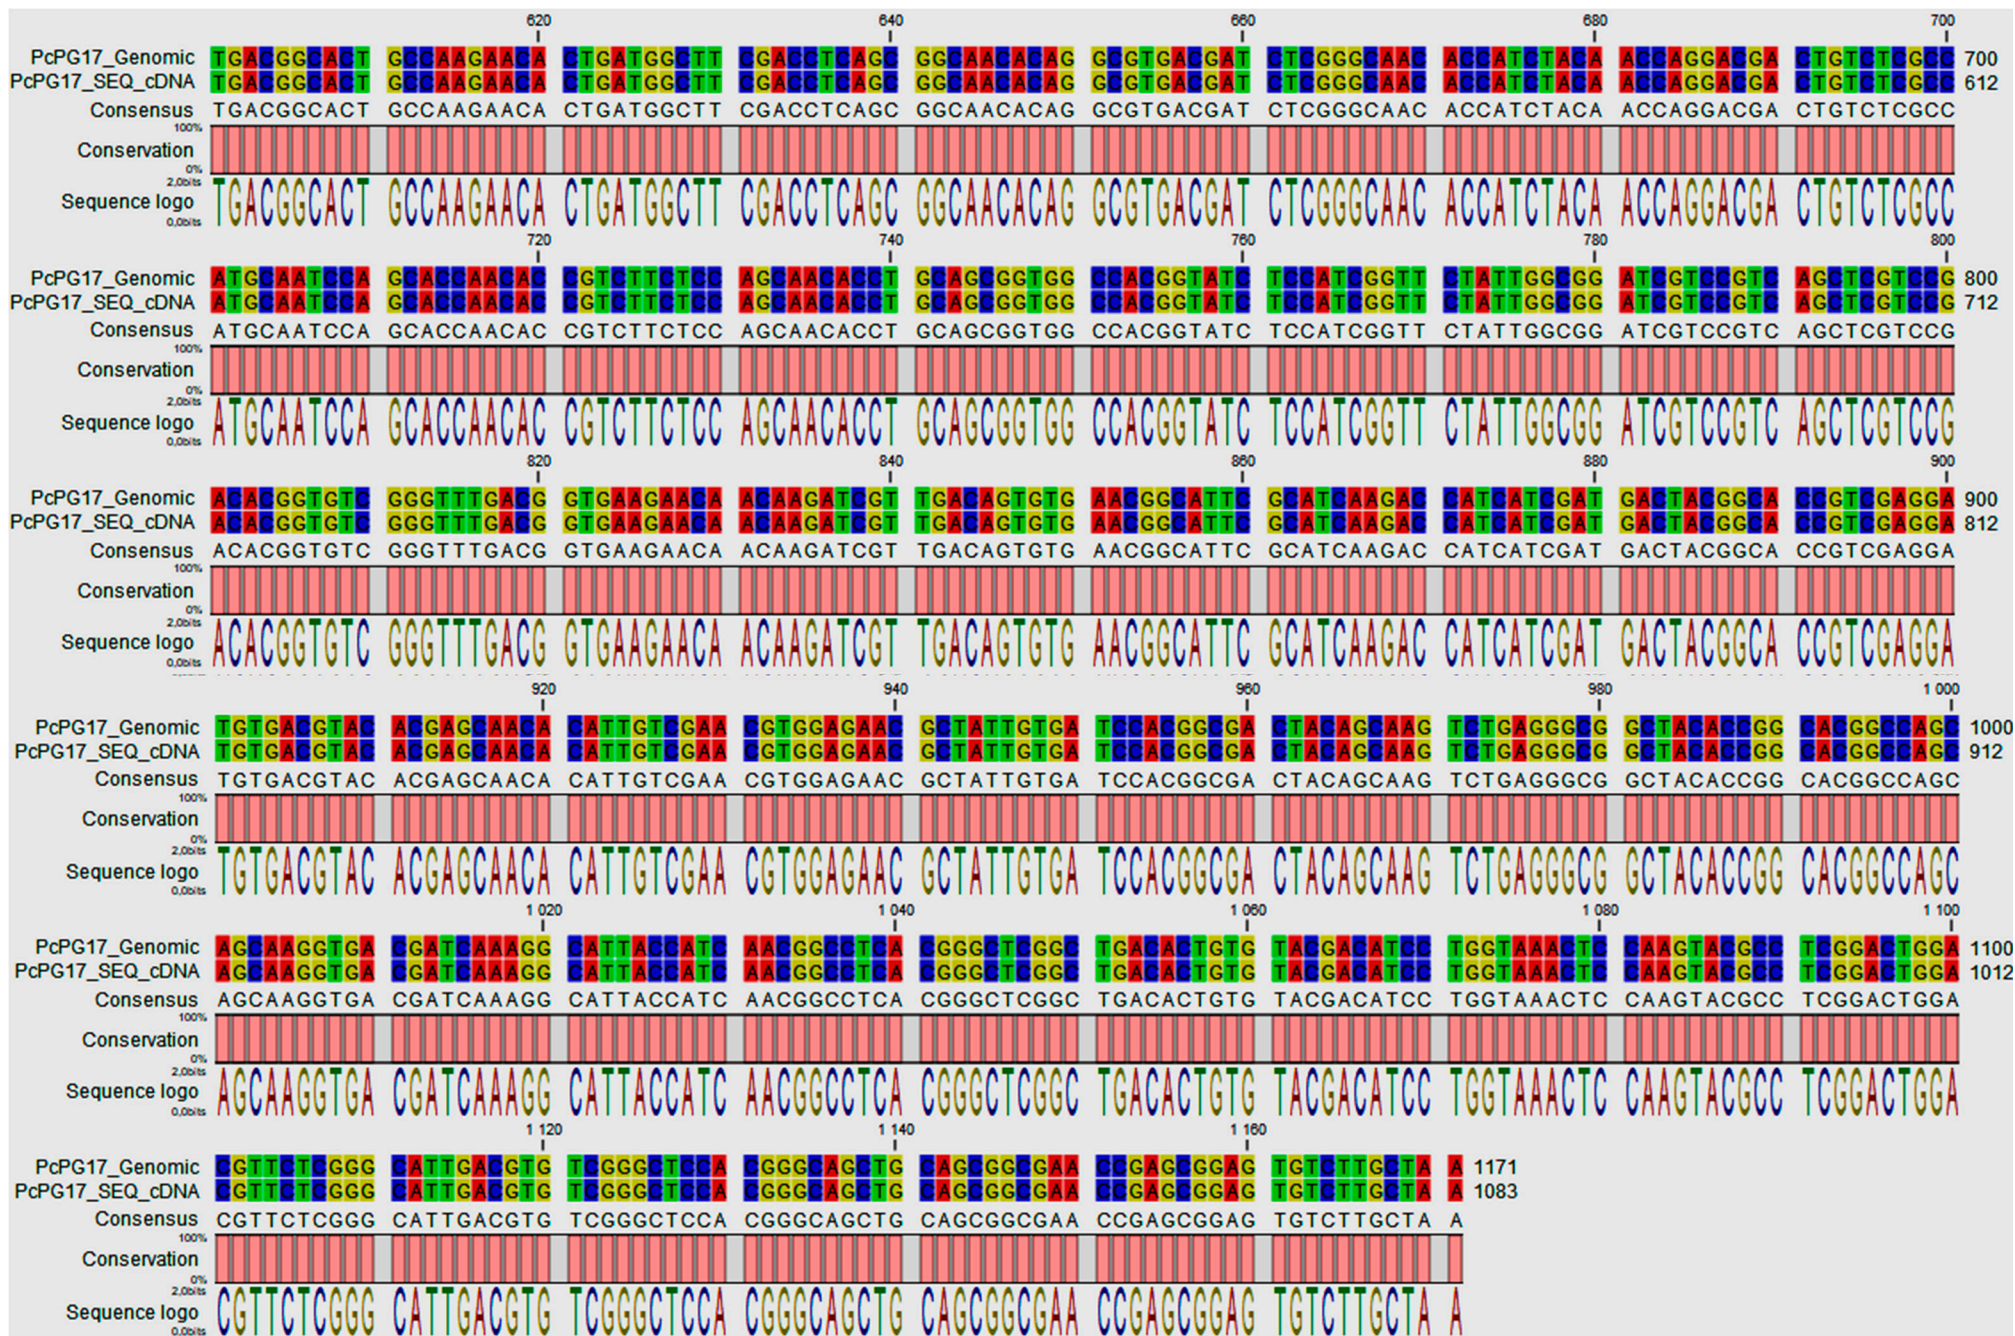



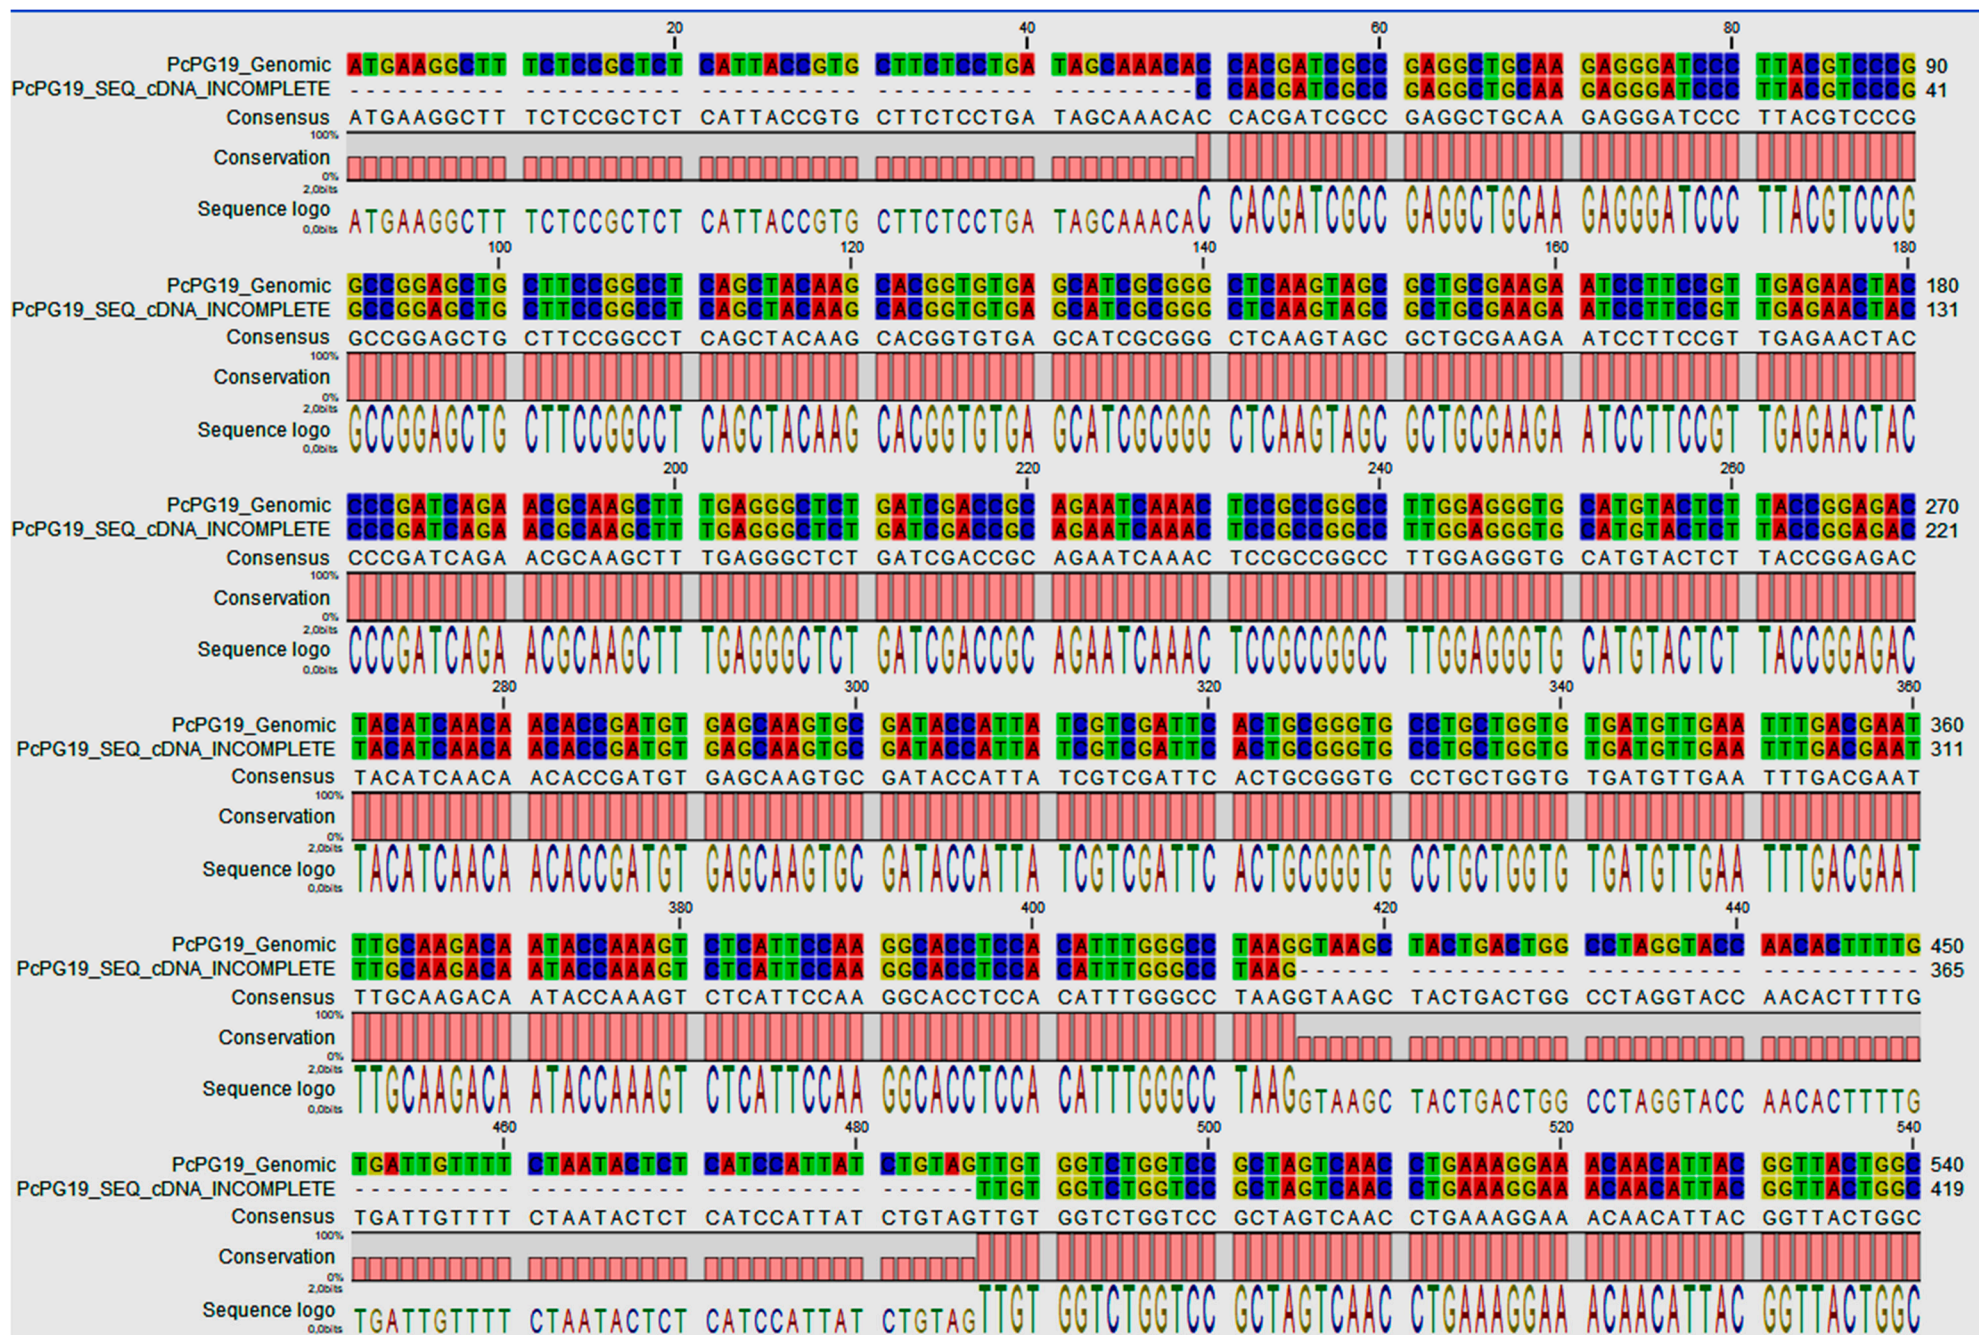



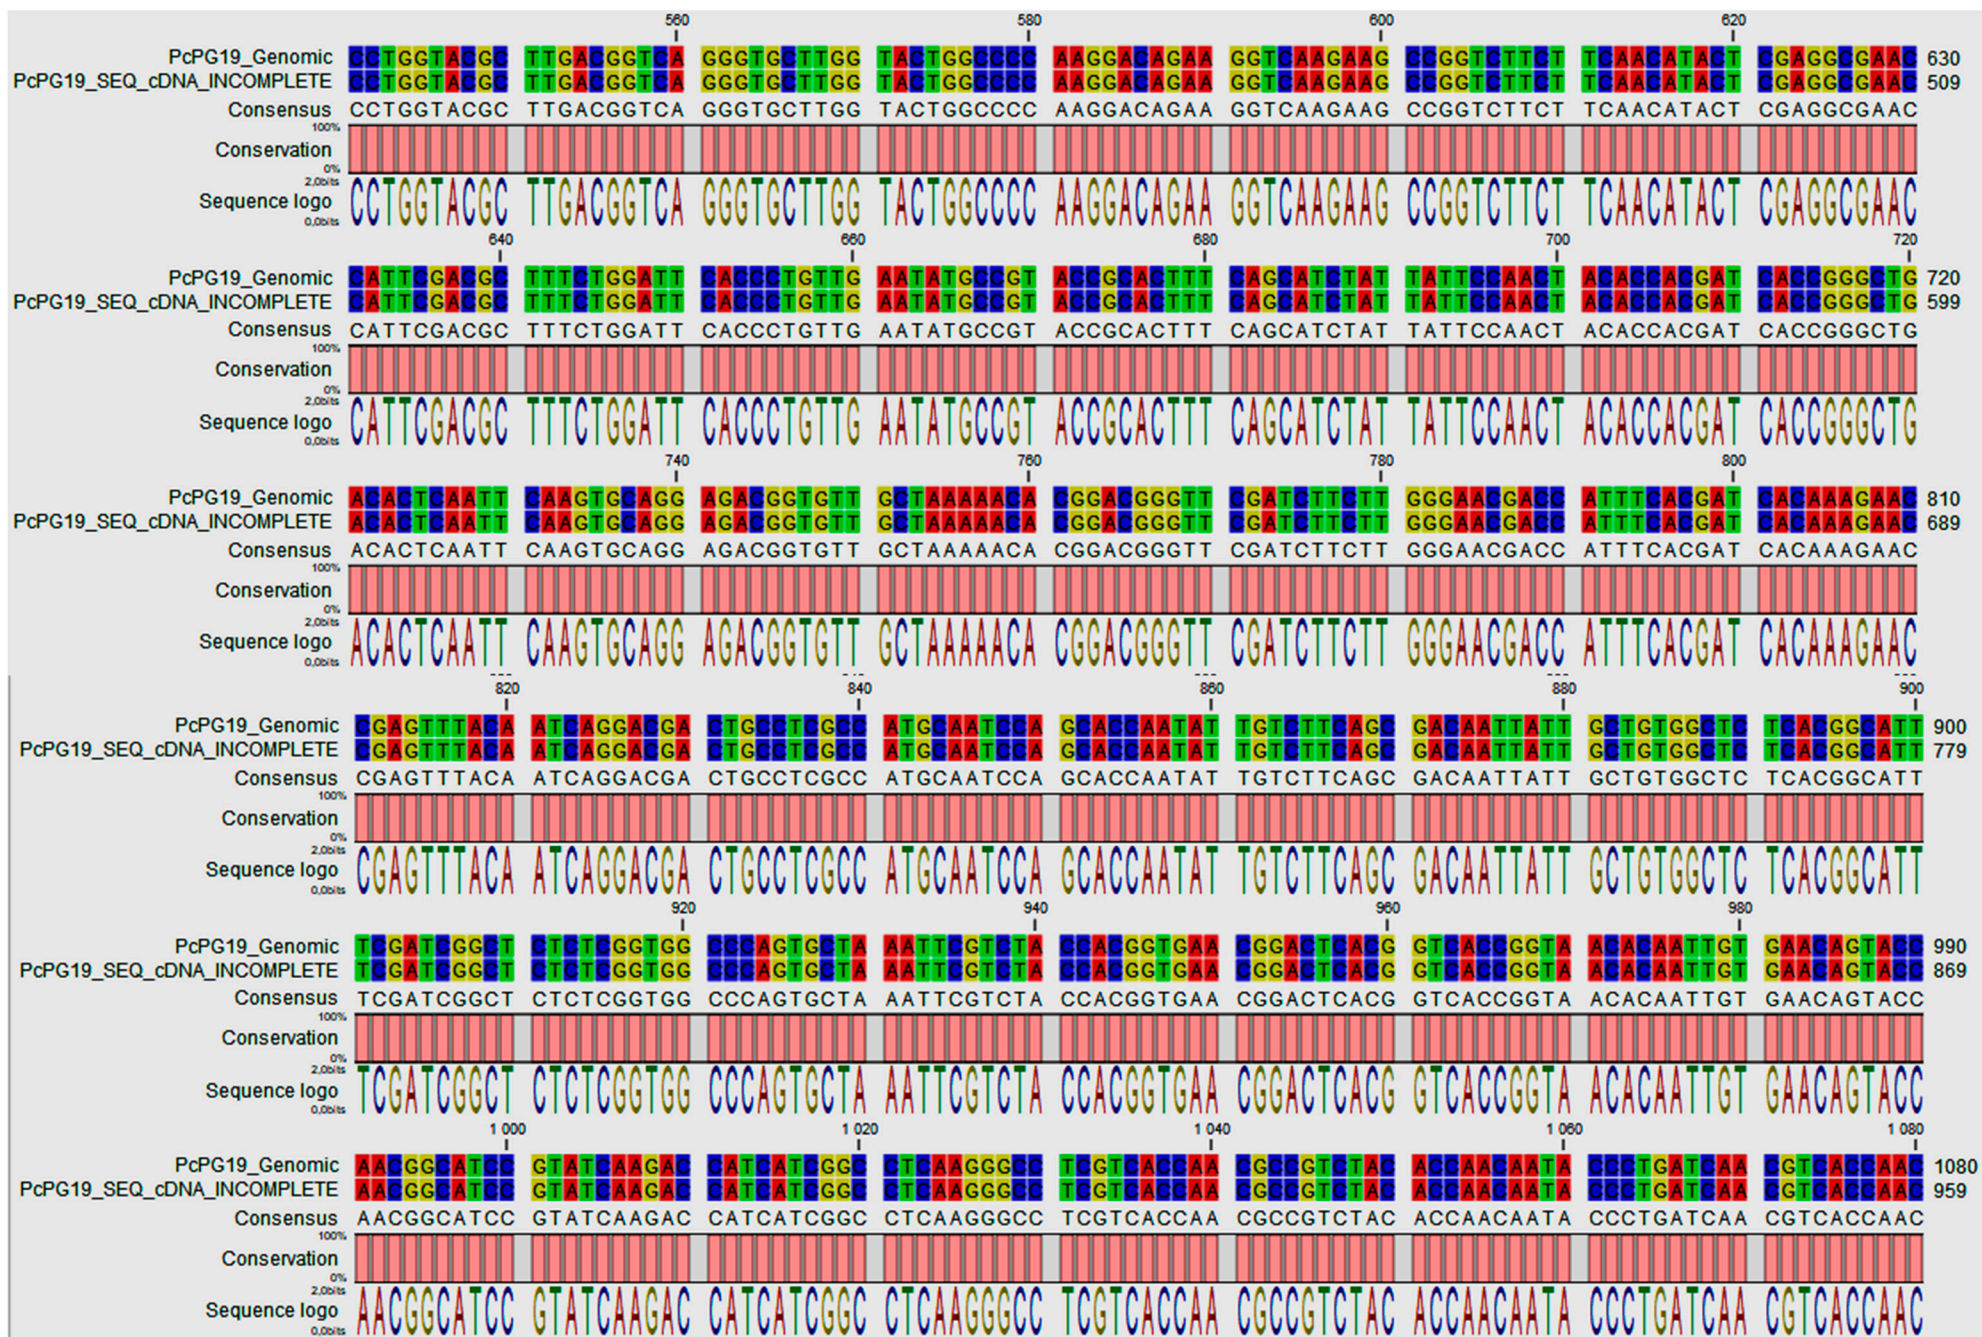

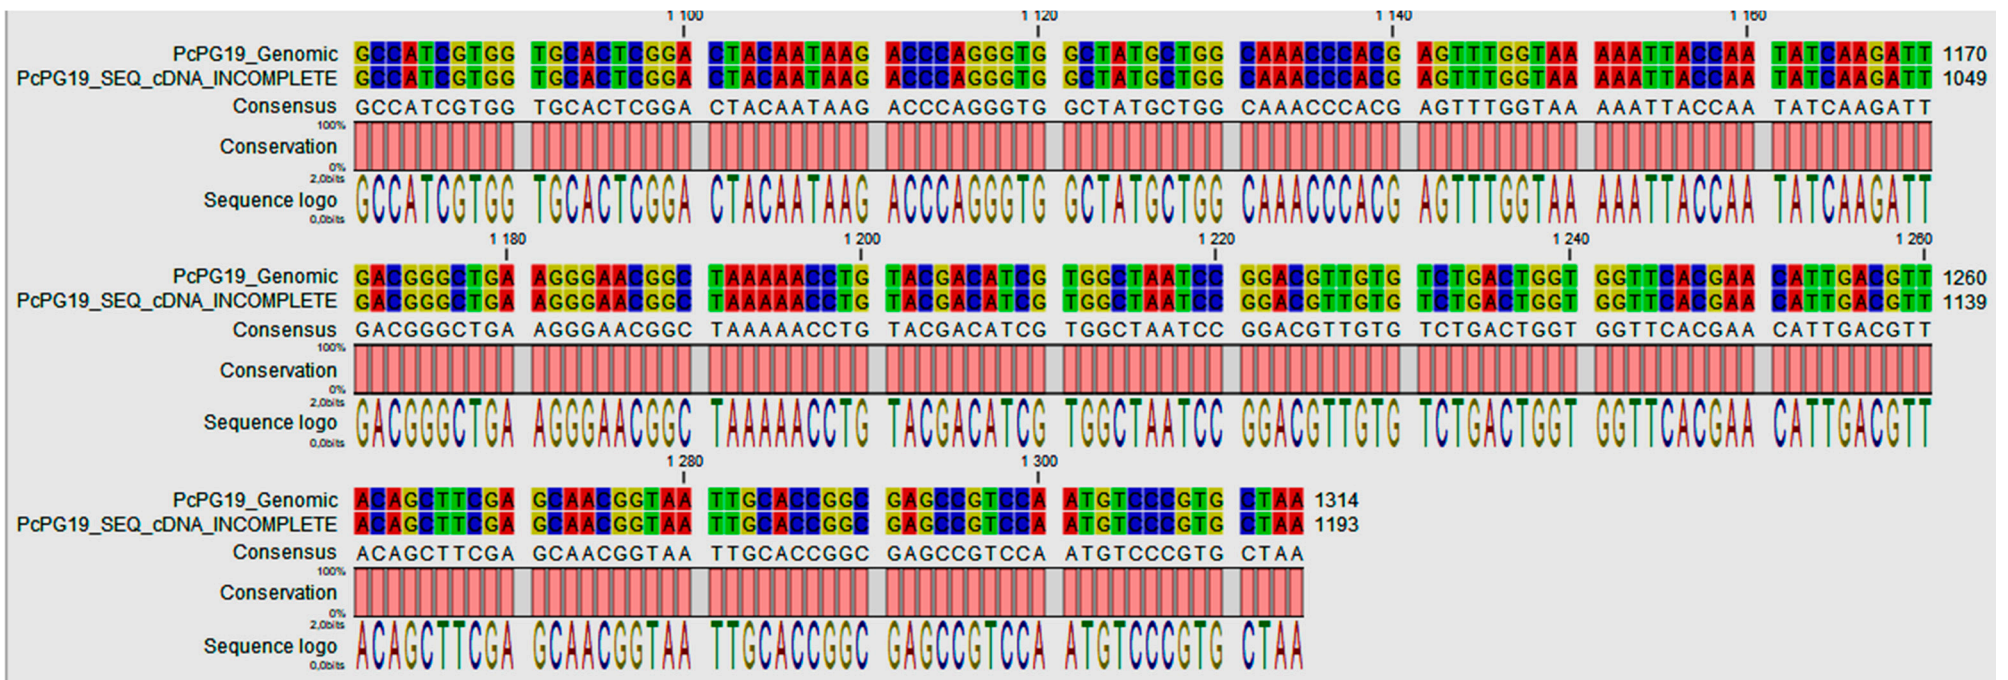



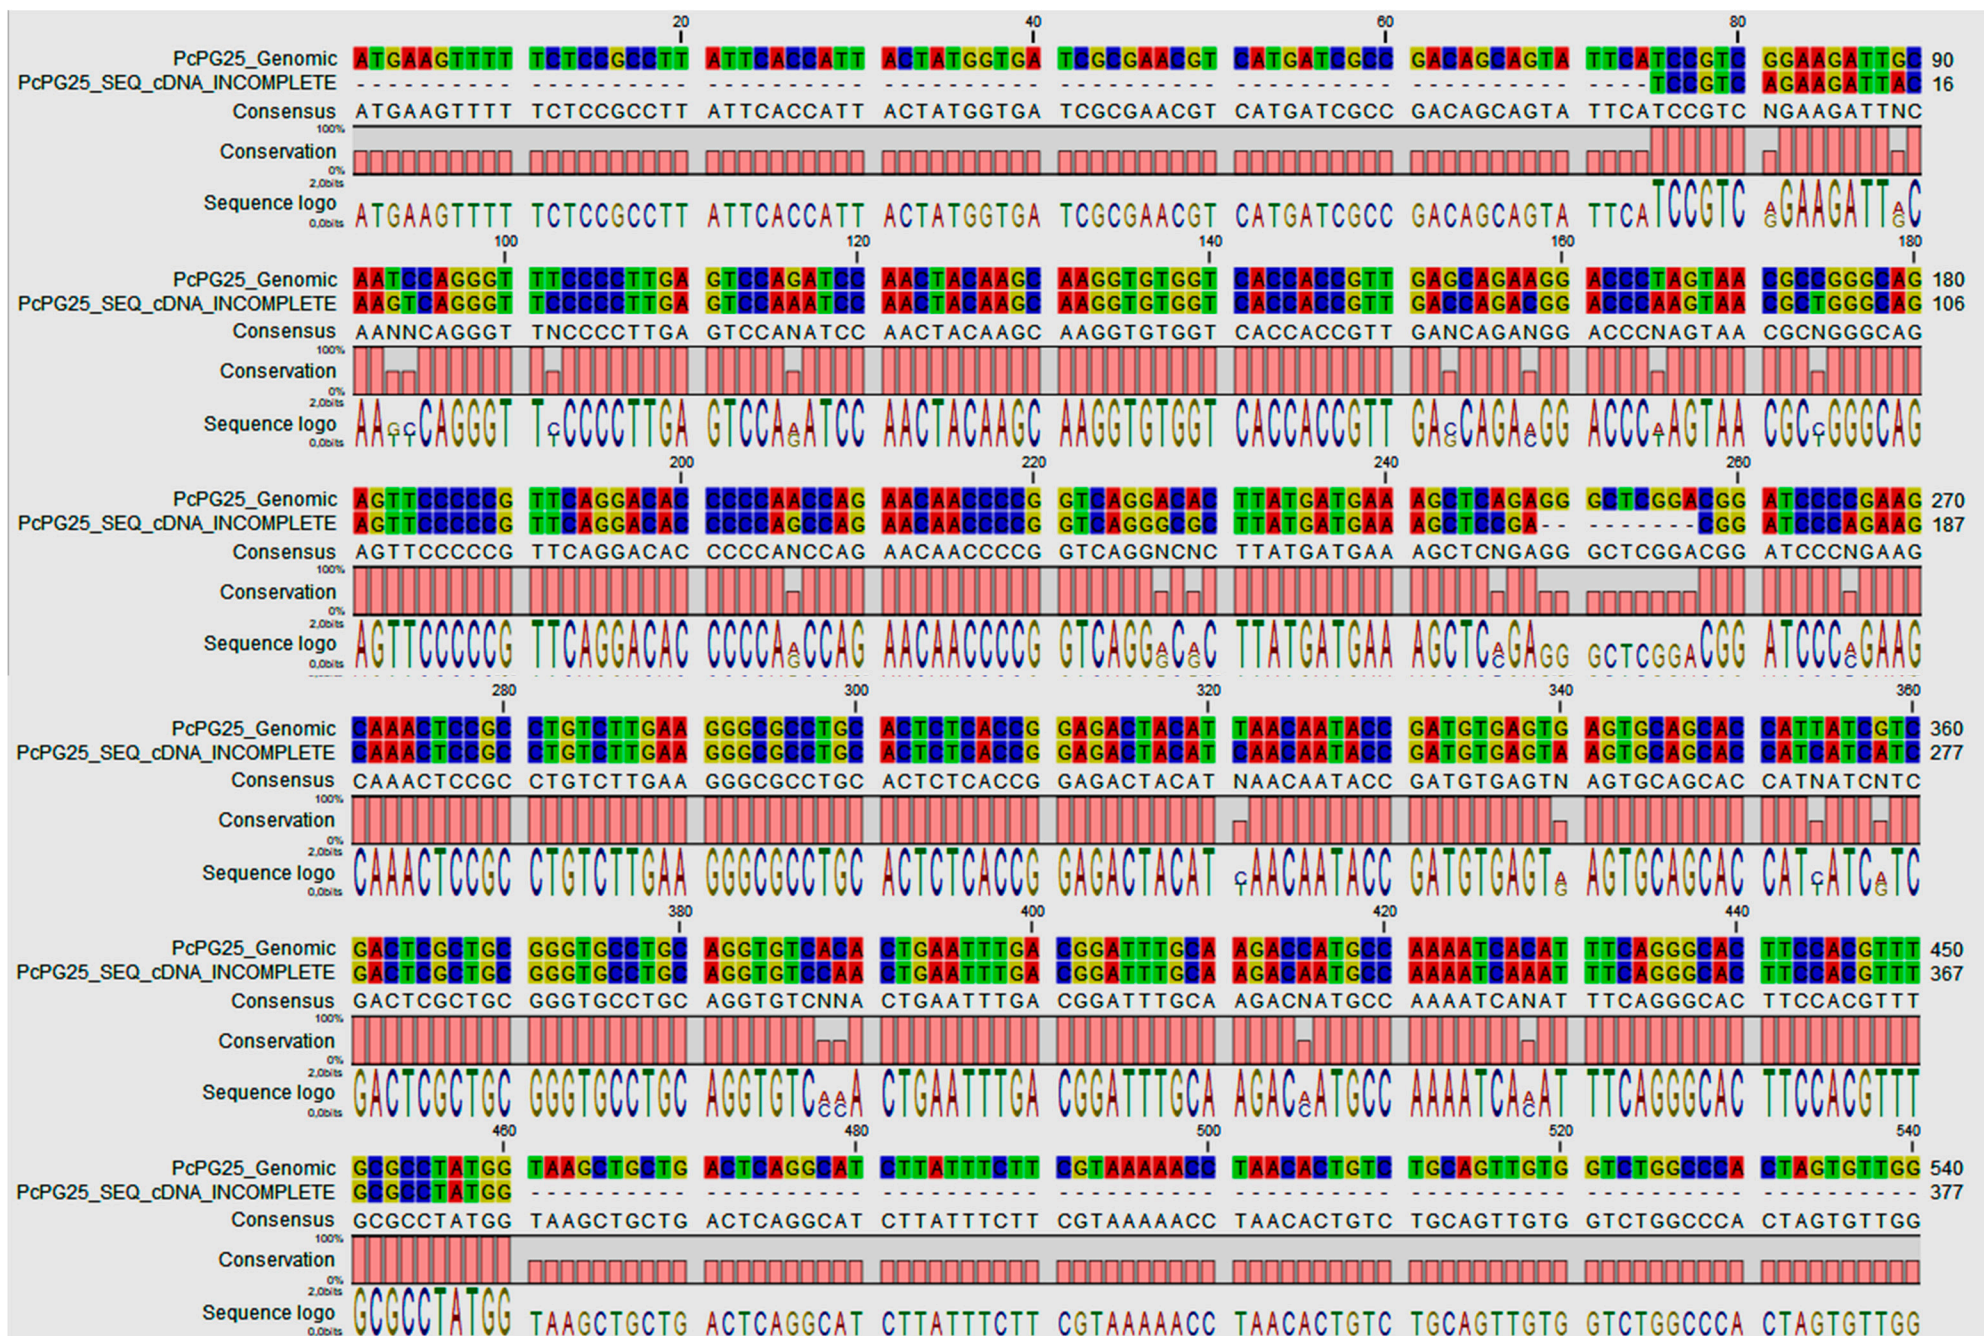



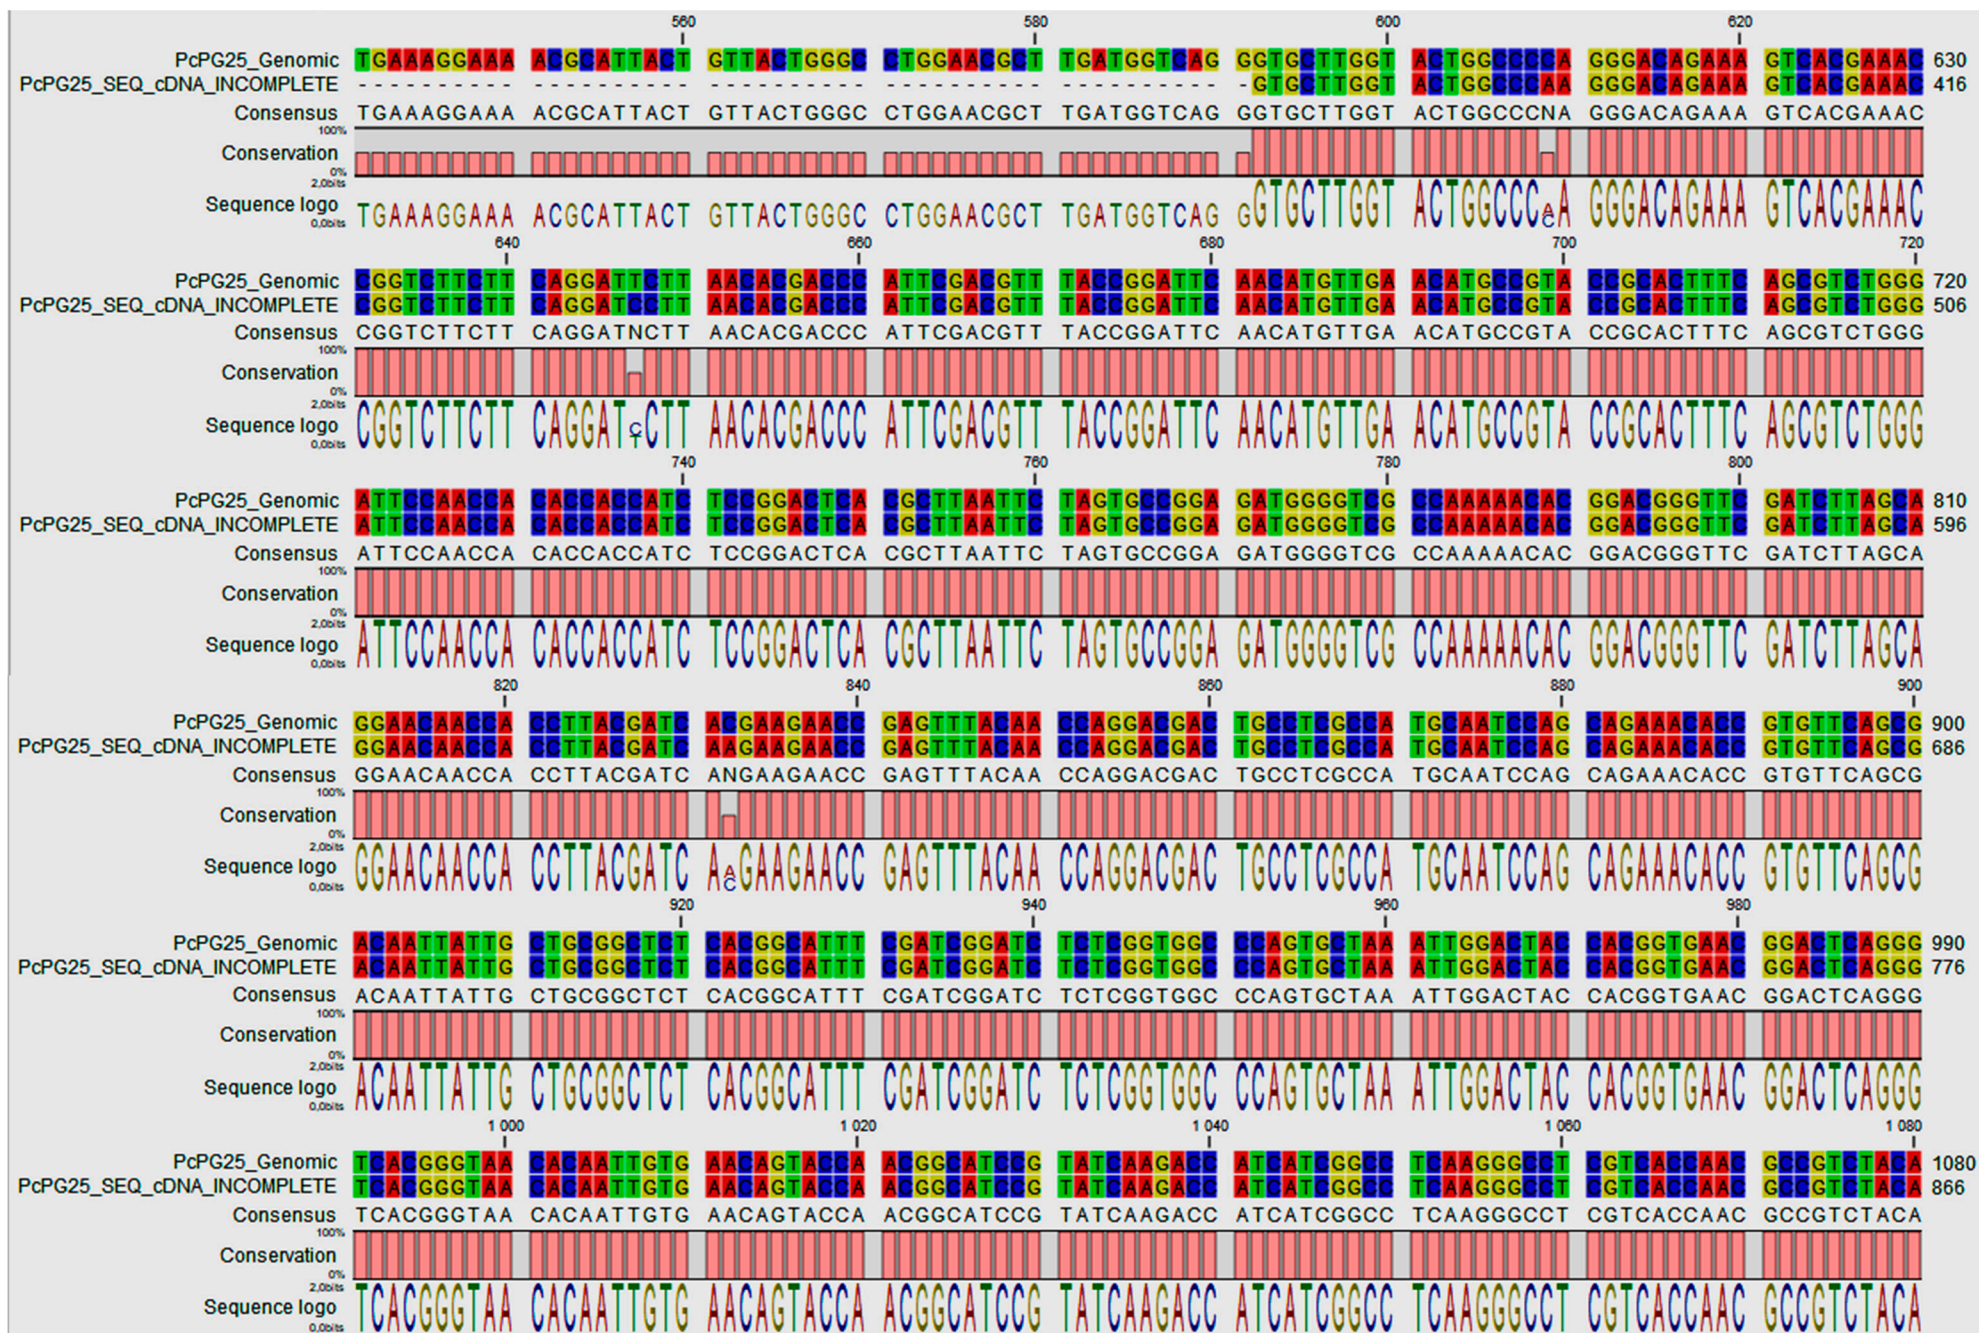

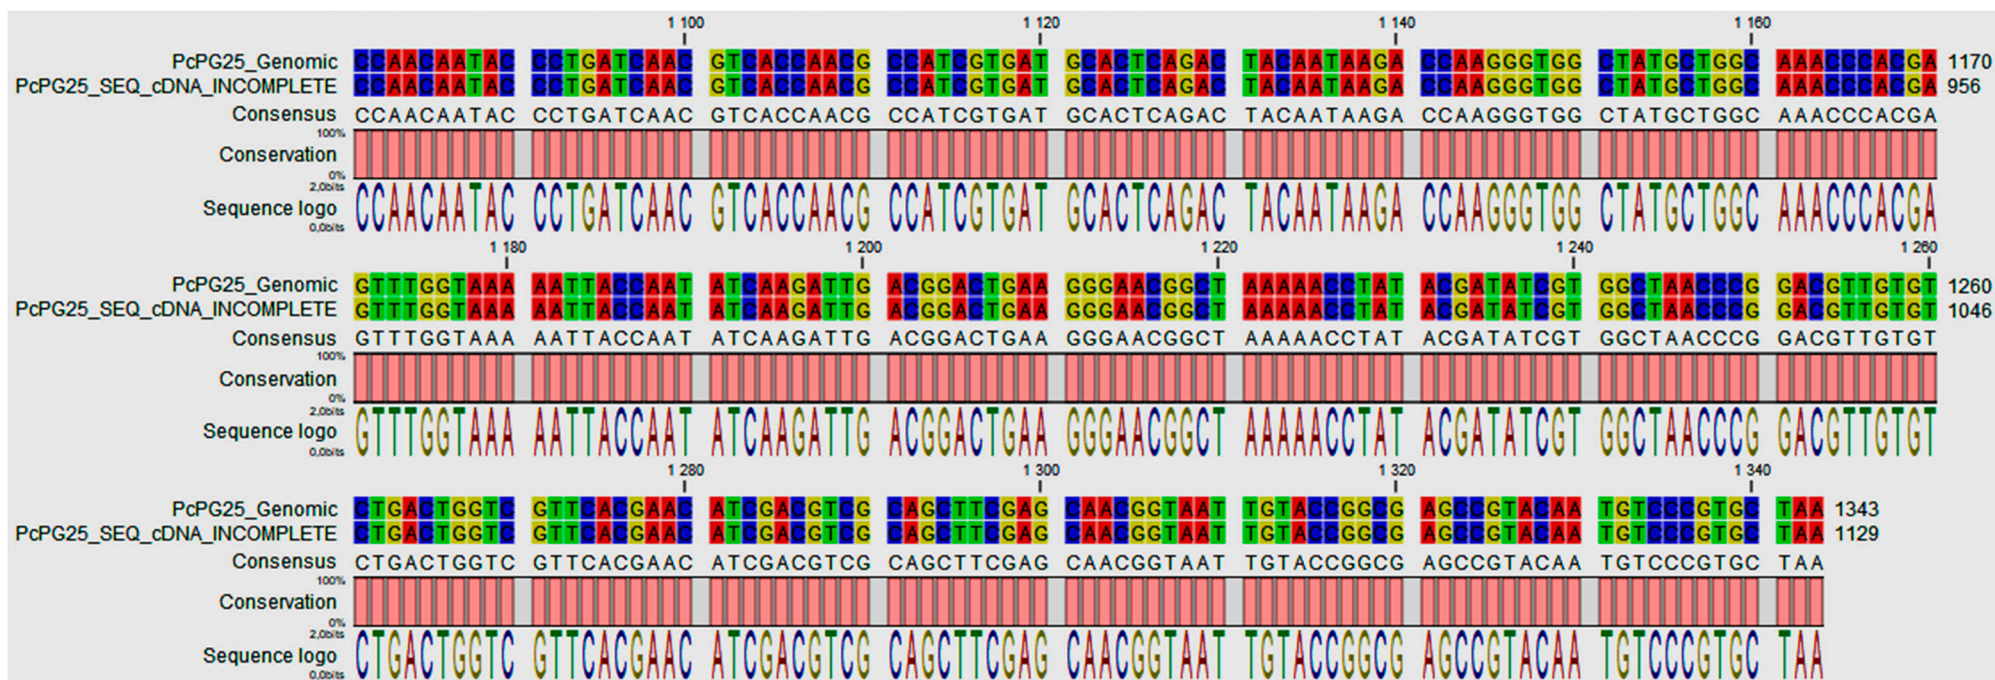

**Figure S3. Pairwise alignment (zoomed in) of intron-containing PG genomic sequences with their corresponding coding sequences.** The genomic sequences of the introns are at the top and the coding sequences are below the genomic sequences. The consensus sequence is shown below the alignment and the sequence conservation is indicated by the pink bars.



**Table S4. Representation of the intron exon boundaries of polygalacturonase genes from *Phytophthora cinnamomi*-GKB4 genome (accession: JAFJYM000000000) using Augustus for gene prediction.**

| <b>Gene name</b> | <b>Gene</b>     | <b>Start codon</b> | <b>CDS1</b>     | <b>CDS2</b>     | <b>CDS3</b> | <b>Stop codon</b> | <b>No. of exons</b> |
|------------------|-----------------|--------------------|-----------------|-----------------|-------------|-------------------|---------------------|
| <i>pcpg1</i>     | 3159477-3160685 | 3160683-3160685    | 3159477-3160496 | 3160563-3160685 | none        | 3064418-3064420   | 2                   |
| <i>Pcpg2</i>     | 3159477-3160685 | 3160683-3160685    | 3159477-3160685 | none            | none        | 3159477-3159479   | 1                   |
| <i>Pcpg3</i>     | 687409-688584   | 688582-688584      | 687409-688584   | none            | none        | 687409-687411     | 1                   |
| <i>Pcpg4</i>     | 699645-700820   | 699645-699647      | 699645-700820   | none            | none        | 700818-700820     | 1                   |
| <i>Pcpg5</i>     | 3117095-3118339 | 3118337-3118339    | 3117095-3118339 | none            | none        | 3117095-3117097   | 1                   |
| <i>Pcpg6</i>     | 3062862-3063947 | 3062862-3062864    | 3062862-3063947 | none            | none        | 3063945-3063947   | 1                   |
| <i>pcpg7</i>     | 690379-691554   | 691552-691554      | 690379-691554   | none            | none        | 690379-690381     | 1                   |
| <i>pcpg8</i>     | 3060266-3061351 | 3061349-3061351    | 3060266-3061351 | none            | none        | 3060266-3060268   | 1                   |
| <i>Pcpg9</i>     | 696762-697853   | 696762-696764      | 696762-697853   | none            | none        | 697851-697853     | 1                   |
| <i>Pcpg10</i>    | 3175783-3177147 | 3177145-3177147    | 3175783-3177147 | none            | none        | 3175783-3175785   | 1                   |
| <i>Pcpg11</i>    | 3179776-3181194 | 3181192-3181194    | 3179776-3181194 | none            | none        | 3179776-3179778   | 1                   |
| <i>Pcpg12</i>    | 3183124-3184542 | 3183124-3183126    | 3183124-3184542 | none            | none        | 3184540-3184542   | 1                   |
| <i>Pcpg13</i>    | 108265-109683   | 109681-109683      | 108265-109683   | none            | none        | 108265-108267     | 1                   |
| <i>Pcpg14</i>    | 111608-113050   | 111608-111610      | 111608-113050   | none            | none        | 113048-113050     | 1                   |

**Table S4. Representation of the intron exon boundaries of polygalacturonase genes from *Phytophthora cinnamomi*-GKB4 genome (accession: JAFJYM000000000) using Augustus for gene prediction.**

| <b>Gene name</b> | <b>Gene</b>     | <b>Start codon</b> | <b>CDS1</b>     | <b>CDS2</b>     | <b>CDS3</b> | <b>Stop codon</b> | <b>No. of exons</b> |
|------------------|-----------------|--------------------|-----------------|-----------------|-------------|-------------------|---------------------|
| <i>Pcpg16</i>    | 3054273-3055432 | 3054273-3054275    | 3054273-3054539 | 3054608-3055432 | none        | 3055430-3055432   | 2                   |
| <i>Pcpg17</i>    | 3056638-3057808 | 3056638-3056640    | 3056638-3056895 | 3056984-3057808 | none        | 3057806-3057808   | 2                   |
| <i>Pcpg19</i>    | 1649208-1650521 | 1650519-1650521    | 1649208-1650035 | 1650108-1650521 | none        | 1649208-1649210   | 2                   |
| <i>Pcpg22</i>    | 444730-446301   | 446299-446301      | 444730-446301   | none            | none        | 444730-444732     | 1                   |
| <i>Pcpg25</i>    | 422021-423363   | 423361-423363      | 422021-422773   | 422905-423363   | none        | 422021-422023     | 2                   |

**Table S5. Protein sequence similarity of full-length and partial putative polygalacturonase proteins of *Phytophthora cinnamomi* to PG proteins from *Phytophthora* spp., based on BLASTP analyses.**

| <b>New gene name</b> | <b>Query ID from the South African genome</b> | <b>NCBI accession</b> | <b>Query coverage</b> | <b>E-value</b> | <b>% Identity</b> | <b>Species description</b>                                                | <b>Reference</b> |
|----------------------|-----------------------------------------------|-----------------------|-----------------------|----------------|-------------------|---------------------------------------------------------------------------|------------------|
| PcPG1                | OL334941                                      | AAN05466              | 99%                   | 0.0            | 90.82%            | Polygalacturonase 7 [ <i>P. cinnamomi</i> ]                               | [1]              |
| PcPG2                | OL334942                                      | AAN05466              | 99%                   | 0.0            | 96.86%            | Polygalacturonase 7 [ <i>P. cinnamomi</i> ]                               | [1]              |
| PcPG3                | OL334943                                      | KUF94019              | 99%                   | 0.0            | 84.65%            | Endopolygalacturonase 2 [ <i>P. nicotianae</i> ]                          | [2]              |
| PcPG4                | OL334944                                      | KUF94019              | 99%                   | 0.0            | 84.65%            | Endopolygalacturonase 2 [ <i>P. nicotianae</i> ]                          | [2]              |
| PcPG5                | OL334945                                      | AAN05466              | 99%                   | 0.0            | 99.52%            | Polygalacturonase 7 [ <i>P. cinnamomi</i> ]                               | [1]              |
| PcPG6                | OL334946                                      | AAN34613              | 99%                   | 0.0            | 100%              | Polygalacturonase 2 [ <i>P. cinnamomi</i> ]                               | [1]              |
| PcPG7                | OL334947                                      | KUF94019              | 99%                   | 0.0            | 79.69%            | Endopolygalacturonase 2 [ <i>P. nicotianae</i> ]                          | [2]              |
| PcPG8                | OL334948                                      | AAN34614              | 99%                   | 0.0            | 99.72%            | Polygalacturonase 3 [ <i>P. cinnamomi</i> ]                               | [1]              |
| PcPG9                | OL334949                                      | POM75086              | 99%                   | 0.0            | 78.51%            | Polygalacturonase [ <i>Phytophthora palmivora</i> var. <i>palmivora</i> ] | [3]              |
| PcPG10               | OL334950                                      | AAN05465              | 99%                   | 0.0            | 99.78%            | Polygalacturonase 10 [ <i>P. cinnamomi</i> ]                              | [1]              |
| PcPG11               | OL334951                                      | KUF84330              | 96%                   | 0.0            | 73.03%            | Polygalacturonase [ <i>P. nicotianae</i> ]                                | Unpublished      |
| PcPG12               | OL334952                                      | KUF84330              | 96%                   | 0.0            | 73.03%            | Polygalacturonase [ <i>P. nicotianae</i> ]                                | Unpublished      |

**Table S5. Protein sequence similarity of full-length and partial putative polygalacturonase proteins of *Phytophthora cinnamomi*, to PGs from *Phytophthora spp.* based on BLASTP analyses.**

| <b>New gene name</b> | <b>Query ID from JGI</b> | <b>NCBI accession</b> | <b>Query coverage</b> | <b>E-value</b> | <b>% Identity</b> | <b>Species description</b>                              | <b>Reference</b> |
|----------------------|--------------------------|-----------------------|-----------------------|----------------|-------------------|---------------------------------------------------------|------------------|
| PcPG13               | OL334953                 | KUF84330              | 96%                   | 0.0            | 73.03%            | Polygalacturonase<br>[ <i>P. nicotianae</i> ]           | Unpublished      |
| PcPG14               | OL334954                 | KUF84330              | 96%                   | 0.0            | 71.77%            | Polygalacturonase<br>[ <i>P. nicotianae</i> ]           | Unpublished      |
| PcPG15               | OL334955                 | AAN05468              | 99%                   | 0.0            | 100.00%           | Polygalacturonase 9<br>[ <i>P. cinnamomi</i> ]          | [1]              |
| PcPG16               | OL334956                 | AAN34616              | 99%                   | 0.0            | 99.72%            | Polygalacturonase 6<br>[ <i>P. cinnamomi</i> ]          | [1]              |
| PcPG17               | OL334957                 | AAN34616              | 99%                   | 0.0            | 87.88%            | Polygalacturonase 6<br>[ <i>P. cinnamomi</i> ]          | [1]              |
| PcPG18               | OL334958                 | AAN34612              | 99%                   | 0.0            | 100%              | polygalacturonase 1<br>[ <i>P. cinnamomi</i> ]          | [1]              |
| PcPG19               | OL334959                 | AAN05463              | 99%                   | 0.0            | 100%              | Polygalacturonase 16<br>[ <i>P. cinnamomi</i> ]         | [1]              |
| PcPG20               | OL334960                 | AAN34615              | 99%                   | 0.0            | 100%              | Polygalacturonase 4<br>[ <i>P. cinnamomi</i> ]          | [1]              |
| PcPG21               | OL334961                 | AAN05458              | 99%                   | 0.0            | 100%              | Polygalacturonase 19<br>[ <i>P. cinnamomi</i> ]         | [1]              |
| PcPG22               | OL334962                 | ADN18856              | 62%                   | 0.0            | 86.89%            | Polygalacturonase 12<br>[ <i>Phytophthora capsici</i> ] | Unpublished      |
| PcPG23               | OL334963                 | AAN05465              | 99%                   | 0.0            | 99.75%            | Polygalacturonase<br>[ <i>P. cinnamomi</i> ]            | [1]              |
| PcPG24               | OL334964                 | AAN05458              | 66%                   | 0.0            | 95.19%            | Polygalacturonase 19<br>[ <i>P. cinnamomi</i> ]         | [1]              |
| PcPG25               | OL334965                 | AAN05464              | 87%                   | 0.0            | 80.68%            | Polygalacturonase 17<br>[ <i>P. cinnamomi</i> ]         | [1]              |
| PcPG26               | OL334966                 | AAN05466              | 99%                   | 0.0            | 99.44%            | Polygalacturonase 7<br>[ <i>P. cinnamomi</i> ]          | [1]              |

**Table S5. Protein sequence similarity of full-length and partial putative polygalacturonase proteins of *Phytophthora cinnamomi*, to PGs from *Phytophthora spp.* based on BLASTP analyses.**

| <b>New gene name</b> | <b>Query ID from JGI</b> | <b>NCBI accession</b> | <b>Query coverage</b> | <b>E-value</b> | <b>% Identity</b> | <b>Species description</b>                                         | <b>Reference</b> |
|----------------------|--------------------------|-----------------------|-----------------------|----------------|-------------------|--------------------------------------------------------------------|------------------|
| PcPG27               | OL334967                 | AAN05466              | 99%                   | 2e-124         | 66.26%            | Polygalacturonase 7<br>[ <i>P. cinnamomi</i> ]                     | [1]              |
| PcPG28               | OL334968                 | POM75086              | 96%                   | 7e-89          | 75.84%            | Polygalacturonase [ <i>P. palmivora</i> var.<br><i>palmivora</i> ] | [3]              |
| PcPG29               | OL334969                 | XP_009520006          | 98%                   | 3e-83          | 83.87%            | Polygalacturonase<br>[ <i>Phytophthora sojae</i> ]                 | [4]              |
| PcPG30               | OL334970                 | AAN05467              | 99%                   | 5e-103         | 100%              | Polygalacturonase 8<br>[ <i>P. cinnamomi</i> ]                     | [1]              |
| PcPG31               | OL334971                 | AAN05466              | 99%                   | 2e-113         | 83.33%            | Polygalacturonase 7<br>[ <i>P. cinnamomi</i> ]                     | [1]              |
| PcPG32               | OL334972                 | AAN05466              | 92%                   | 2e-113         | 78.18%            | Polygalacturonase 7<br>[ <i>P. cinnamomi</i> ]                     | [1]              |
| PcPG33               | OL334973                 | AAN05466              | 85%                   | 8e-72          | 68.51%            | Polygalacturonase 7<br>[ <i>P. cinnamomi</i> ]                     | [1]              |
| PcPG34               | OL334974                 | AAN05466              | 99%                   | 3e-62          | 69.09%            | Polygalacturonase 7<br>[ <i>P. cinnamomi</i> ]                     | [1]              |
| PcPG35               | OL334975                 | AAN05466              | 78%                   | 7e-40          | 63.43%            | Polygalacturonase 7<br>[ <i>P. cinnamomi</i> ]                     | [1]              |
| PcPG36               | OL334976                 | AAN05466              | 94%                   | 5e-24          | 73.97%            | Polygalacturonase 7<br>[ <i>P. cinnamomi</i> ]                     | [1]              |
| PcPG37               | OL334977                 | AAN05467              | 65%                   | 1e-19          | 72.31%            | Polygalacturonase 8<br>[ <i>P. cinnamomi</i> ]                     | [1]              |

**Table S6. Full-length and partial polygalacturonase sequences from *Phytophthora cinnamomi*.**

| <b>PG gene ID</b> | <b>Predicted protein (aa)</b> | <b>Signal peptide &amp; position</b> | <b>GH28 domain</b> | <b>Catalytic (G/QDD &amp; G/SHG) &amp; Binding domains (NTD &amp; RIK)</b> | <b>Full-length/ partial</b> |
|-------------------|-------------------------------|--------------------------------------|--------------------|----------------------------------------------------------------------------|-----------------------------|
| PcPG1             | 381 aa                        | Yes 20 – 21                          | Yes - incomplete   | QDD & GHG and NTD & RIK                                                    | Full-length                 |
| PcPG2             | 403 aa                        | Yes 20 – 21                          | Yes - incomplete   | QDD & GHG and NTD & RIK                                                    | Full-length                 |
| PcPG3             | 392 aa                        | Yes 20 – 21                          | Yes - incomplete   | QDD & GHG and NTD & RIK                                                    | Full-length                 |
| PcPG4             | 392 aa                        | Yes 20 – 21                          | Yes - incomplete   | QDD & GHG and NTD & RIK                                                    | Full-length                 |
| PcPG5             | 415 aa                        | Yes 20 – 21                          | Yes - incomplete   | QDD & GHG and NTD & RIK                                                    | Full-length                 |
| PcPG6             | 362 aa                        | Yes 20 – 21                          | Yes – complete     | QDD & GHG and NTD & RIK                                                    | Full-length                 |
| PcPG7             | 392 aa                        | Yes 20 – 21                          | Yes - incomplete   | QDD & GHG and NTD & RIK                                                    | Full-length                 |
| PcPG8             | 362 aa                        | Yes 20 – 21                          | Yes - complete     | QDD & GHG and NTD & RIK                                                    | Full-length                 |
| PcPG9             | 364 aa                        | Yes 20 – 21                          | Yes - incomplete   | QDD & GHG and NTD & RIK                                                    | Full-length                 |
| PcPG10            | 455 aa                        | Yes 20 – 21                          | Yes - incomplete   | QDD & GHG and NTD & RIK                                                    | Full-length                 |
| PcPG11            | 473 aa                        | Yes 20 – 21                          | Yes - complete     | QDD & GHG and NTD & RIK                                                    | Full-length                 |
| PcPG12            | 473 aa                        | Yes 20 – 21                          | Yes - complete     | QDD & GHG and NTD & RIK                                                    | Full-length                 |
| PcPG13            | 473 aa                        | Yes 20 – 21                          | Yes - complete     | QDD & GHG and NTD & RIK                                                    | Full-length                 |
| PcPG14            | 481 aa                        | Yes 20 – 21                          | Yes - complete     | QDD & GHG and NTD & RIK                                                    | Full-length                 |
| PcPG15            | 356 aa                        | No <sup>a</sup>                      | _____              |                                                                            | Partial                     |
| PcPG16            | 364 aa                        | Yes 20 – 21                          | Yes – incomplete   | QDD & GHG and NTD & RIK                                                    | Full-length                 |

The \_\_\_ is an indication that the sequence was removed for further analysis, and the blank spaces indicate that further analysis was not conducted for the sequence, and therefore there are no results to record.



**Table S6. Full-length and partial polygalacturonase sequences from *Phytophthora cinnamomi***

| <b>PG gene ID</b> | <b>Predicted protein (aa)</b> | <b>Signal peptide &amp; position</b> | <b>GH28 domain</b> | <b>Catalytic (G/QDD &amp; G/SHG) &amp; Binding domains (NTD &amp; RIK)</b> | <b>Full-length/ partial</b> |
|-------------------|-------------------------------|--------------------------------------|--------------------|----------------------------------------------------------------------------|-----------------------------|
| PcPG17            | 361 aa                        | Yes 20 – 21                          | Yes – complete     | QDD & GHG and NTD & RIK                                                    | Full-length                 |
| PcPG18            | 349 aa                        | No <sup>a</sup>                      | _____              |                                                                            | Partial                     |
| PcPG19            | 414 aa                        | Yes 22 – 23                          | Yes – incomplete   | QDD & SHG and NTD & RIK                                                    | Full-length                 |
| PcPG20            | 340 aa                        | No <sup>a</sup>                      | _____              |                                                                            | Partial                     |
| PcPG21            | 328 aa                        | No <sup>c</sup>                      | _____              |                                                                            | Partial                     |
| PcPG22            | 524 aa                        | Yes 19 – 20                          | Yes – incomplete   | QDD & GHG and NTD & RIK                                                    | Full-length                 |
| PcPG23            | 400 aa                        | Yes 20 – 21                          | Yes – incomplete   | QDD & GHG and NTD & RIK                                                    | Partial                     |
| PcPG24            | 470 aa                        | No <sup>b</sup>                      | _____              |                                                                            | Partial                     |
| PcPG25            | 404 aa                        | Yes 22 – 23                          | Yes – incomplete   | QDD & SHG and NTD & RIK                                                    | Full-length                 |
| PcPG26            | 189 aa                        | _____                                |                    |                                                                            | Partial                     |
| PcPG27            | 267 aa                        | _____                                |                    |                                                                            | Partial                     |
| PcPG28            | 185 aa                        | _____                                |                    |                                                                            | Partial                     |
| PcPG29            | 158 aa                        | _____                                |                    |                                                                            | Partial                     |
| PcPG30            | 158 aa                        | _____                                |                    |                                                                            | Partial                     |
| PcPG31            | 183 aa                        | _____                                |                    |                                                                            | Partial                     |

<sup>a</sup>The sequence is missing nucleotides in the N-terminal region and has no signal peptide.

---

**Table S6. Full-length and partial polygalacturonase sequences from *Phytophthora cinnamomi***

---

| <b>PG gene ID</b> | <b>Predicted protein (aa)</b> | <b>Signal peptide &amp; position</b> | <b>GH28 domain</b> | <b>Catalytic (G/QDD &amp; G/SHG) &amp; Binding domains (NTD &amp; RIK)</b> | <b>Full-length/ partial</b> |
|-------------------|-------------------------------|--------------------------------------|--------------------|----------------------------------------------------------------------------|-----------------------------|
| PcPG32            | 175 aa                        | _____                                |                    |                                                                            | Partial                     |
| PcPG33            | 183 aa                        | _____                                |                    |                                                                            | Partial                     |
| PcPG34            | 138 aa                        | _____                                |                    |                                                                            | Partial                     |
| PcPG35            | 161 aa                        | _____                                |                    |                                                                            | Partial                     |
| PcPG36            | 73 aa                         | _____                                |                    |                                                                            | Partial                     |
| PcPG37            | 89 aa                         | _____                                |                    |                                                                            | Partial                     |

---

<sup>b</sup>The sequence has an N-terminal region but no signal peptide.

<sup>c</sup>The sequence has no N-terminal region.

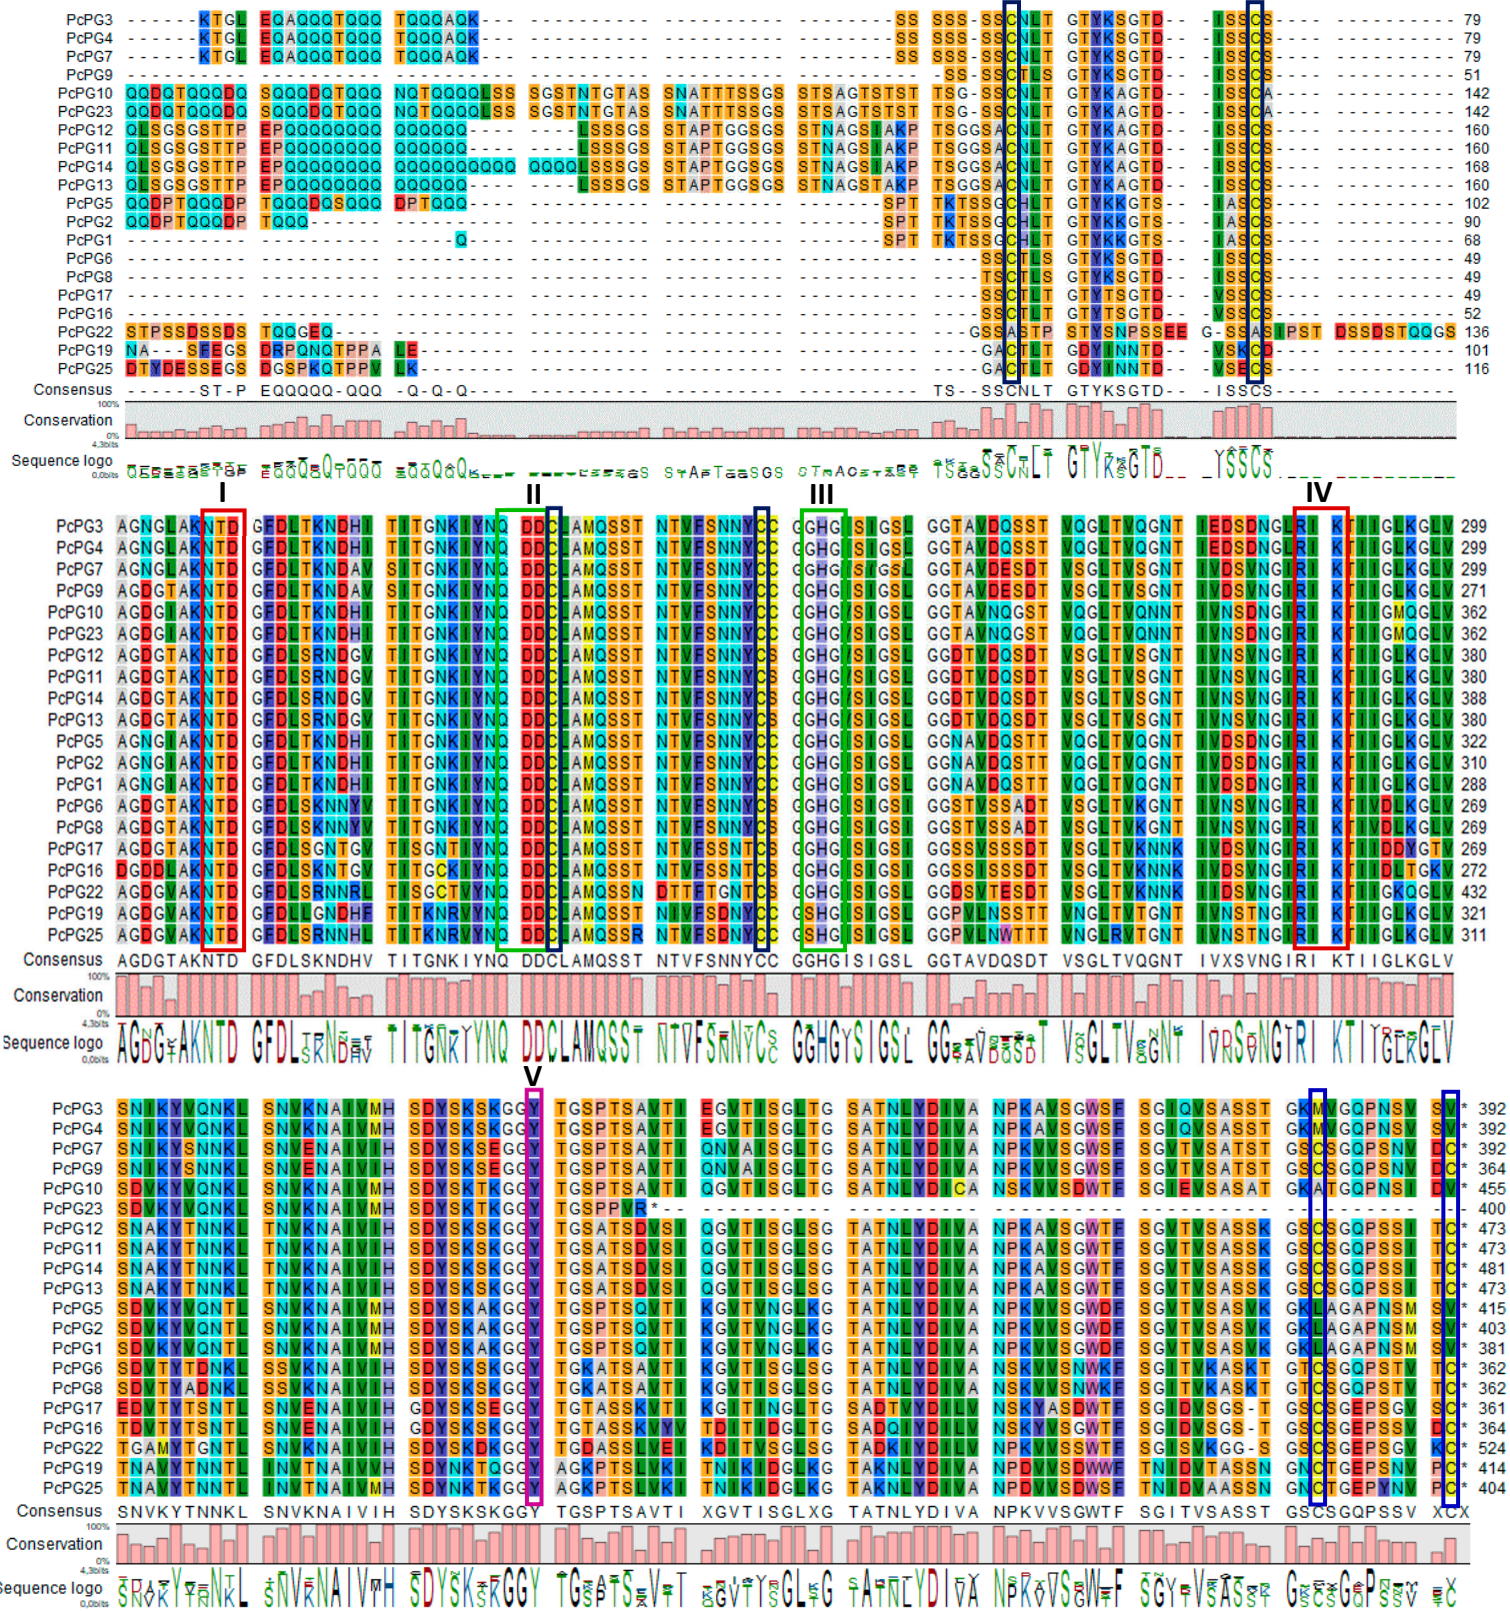

**Figure S4. A multiple sequence alignment of the polygalacturonase protein sequences from *Phytophthora cinnamomi*.** The sequences above contained the required length and signal peptide. The highly conserved cysteine regions (disulphide bridges) in the N-terminal region (top) middle region and C-terminal region (bottom), are marked with blue boxes as shown

above. The PGs analysed contained one to three disulphide bridges. All PG sequences contained the binding domains (NTD & RIK; Domain I & IV) marked in dark red boxes, and the catalytic domains (Q/KDD & G/SHG; Domain II & III) marked in green boxes. The invariantly conserved Y residue (Domain V) is marked by the purple box and present in all PGs analysed. PcPG23 lacked a region towards the end of the polypeptide chain, rendering the protein as a partial sequence.

**Table S7: Log 2-Fold Change gene expression of PG genes from *P. cinnamomi* at 12 hpi, 24 hpi and 120 hpi during colonization of the susceptible avocado rootstock (R. 012) normalized to mycelia.**

| NCBI Gene ID           | New Gene ID          | Normalized read  | 12 hpi vs. mycelia |             | 24 hpi vs. mycelia |             | 120 hpi vs. mycelia |             |
|------------------------|----------------------|------------------|--------------------|-------------|--------------------|-------------|---------------------|-------------|
|                        |                      | count in mycelia | Fold Change        | padj        | Fold Change        | padj        | Fold Change         | padj        |
| <b><i>OL334941</i></b> | <b><i>pcpg1</i></b>  | 7,089050687      | 3,727133085        | 0,361369021 | 5,427063328        | 0,112128501 | 4,952595388         | 0,070323646 |
| <b><i>OL334945</i></b> | <b><i>pcpg5</i></b>  | 12,53317935      | 7,179905644        | 0,011031321 | 5,68872165         | 0,047685514 | 9,253379578         | 2,17858E-06 |
| <b><i>OL334949</i></b> | <b><i>pcpg9</i></b>  | 0,819837188      | 9,357377939        | NA          | 8,82799846         | NA          | 8,695524147         | 0,162009609 |
| <b><i>OL334956</i></b> | <b><i>pcpg16</i></b> | 92,69623888      | -1,528584691       | 0,253232764 | -1,667478691       | 0,116585993 | -0,843269809        | 0,022920738 |
| <b><i>OL334957</i></b> | <b><i>pcpg17</i></b> | 0,164551001      | 5,576107637        | NA          | 5,046727525        | NA          | 2,367419336         | NA          |
| <b><i>OL334959</i></b> | <b><i>pcpg19</i></b> | 4,816470763      | 0,622915905        | NA          | 1,051579347        | NA          | -3,502069754        | 0,014409235 |
| <b><i>OL334962</i></b> | <b><i>pcpg22</i></b> | 19,22077692      | 0,785236322        | 0,781956919 | 4,683865954        | 0,000203064 | -3,339728694        | 0,061227151 |
| <b><i>OL334965</i></b> | <b><i>pcpg25</i></b> | 0,972332323      | 9,357384537        | NA          | 8,828005058        | NA          | 8,933289208         | 0,149438017 |

## References

1. Götesson A, Marshall JS, Jones DA, Hardham AR: **Characterization and evolutionary analysis of a large polygalacturonase gene family in the oomycete plant pathogen *Phytophthora cinnamomi***. *Molecular Plant-Microbe Interactions* 2002, **15**(9):907-921.
2. Liu H, Ma X, Yu H, Fang D, Li Y, Wang X, Wang W, Dong Y, Xiao B: **Genomes and virulence difference between two physiological races of *Phytophthora nicotianae***. *GigaScience* 2016, **5**(1):3.
3. Ali SS, Shao J, Lary DJ, Kronmiller BA, Shen D, Strem MD, Amoako-Attah I, Akrofi AY, Begoude BD, ten Hoopen GM: ***Phytophthora megakarya* and *Phytophthora palmivora*, closely related causal agents of cacao black pod rot, underwent increases in genome sizes and gene numbers by different mechanisms**. *Genome Biology and Evolution* 2017, **9**(3):536-557.
4. Tyler BM, Tripathy S, Zhang X, Dehal P, Jiang RH, Aerts A, Arredondo FD, Baxter L, Bensasson D, Beynon JL: ***Phytophthora* genome sequences uncover evolutionary origins and mechanisms of pathogenesis**. *Science* 2006, **313**(5791):1261-1266.
